# Supplementary material for: Eudesmane and Eremophilane Sesquiterpenes from the Fruits of Alpinia oxyphylla with Protective Effects against Oxidative Stress in Adipose-Derived Mesenchymal Stem Cells
Source: PubMed Central journal article supplement (PMC8004014; doi:10.3390/molecules26061762), 2021-03-21
Supplement: molecules-26-01762-s001.pdf [file molecules-26-01762-s001.pdf]

## Supporting Information

# **Eudesmane and eremophilane sesquiterpenes from the fruits of *Alpinia oxyphylla* with protective effects against oxidative stress in adipose-derived mesenchymal stem cells**

<sup>1</sup> *College of Pharmacy, Yeungnam University, Gyeongsan, Gyeongsangbukdo 38541, Republic of Korea*

<sup>2</sup> *College of Pharmacy, Graduate School of Pharmaceutical Sciences, Ewha Womans University, Seoul 03760, Republic of Korea*

<sup>3</sup> *Advanced Radiation Technology Institute, Korea Atomic Energy Research Institute, Jeollabuk-do, Jeongeup-si 56212, Republic of Korea*

\*Authors for correspondence

E-mail addresses: jwnam@yu.ac.kr (J.-W. Nam), yuny@ewha.ac.kr (E. K. Seo)

## Table of contents

|             |                                                                                          |    |
|-------------|------------------------------------------------------------------------------------------|----|
| Figure S1.  | <sup>1</sup> H NMR (400 MHz, CDCl <sub>3</sub> ) of compound <b>1</b> .....              | 3  |
| Figure S2.  | <sup>13</sup> C NMR (100 MHz, CDCl <sub>3</sub> ) of compound <b>1</b> .....             | 4  |
| Figure S3.  | DEPT-135 (100 MHz, CDCl <sub>3</sub> ) of compound <b>1</b> .....                        | 5  |
| Figure S4.  | <sup>1</sup> H- <sup>1</sup> H COSY NMR (CDCl <sub>3</sub> ) of compound <b>1</b> .....  | 6  |
| Figure S5.  | <sup>1</sup> H- <sup>13</sup> C HSQC NMR (CDCl <sub>3</sub> ) of compound <b>1</b> ..... | 7  |
| Figure S6.  | <sup>1</sup> H- <sup>13</sup> C HMBC NMR (CDCl <sub>3</sub> ) of compound <b>1</b> ..... | 8  |
| Figure S7.  | <sup>1</sup> H- <sup>1</sup> H NOESY NMR (CDCl <sub>3</sub> ) of compound <b>1</b> ..... | 9  |
| Figure S8.  | HR-ESIMS of compound <b>1</b> .....                                                      | 10 |
| Figure S9.  | <sup>1</sup> H NMR (400 MHz, CDCl <sub>3</sub> ) of compound <b>2</b> .....              | 11 |
| Figure S10. | <sup>13</sup> C NMR (100 MHz, CDCl <sub>3</sub> ) of compound <b>2</b> .....             | 12 |
| Figure S11. | DEPT-135 (100 MHz, CDCl <sub>3</sub> ) of compound <b>2</b> .....                        | 13 |
| Figure S12. | <sup>1</sup> H- <sup>1</sup> H COSY NMR (CDCl <sub>3</sub> ) of compound <b>2</b> .....  | 14 |
| Figure S13. | <sup>1</sup> H- <sup>13</sup> C HSQC NMR (CDCl <sub>3</sub> ) of compound <b>2</b> ..... | 15 |
| Figure S14. | <sup>1</sup> H- <sup>13</sup> C HMBC NMR (CDCl <sub>3</sub> ) of compound <b>2</b> ..... | 16 |
| Figure S15. | <sup>1</sup> H- <sup>1</sup> H NOESY NMR (CDCl <sub>3</sub> ) of compound <b>2</b> ..... | 17 |
| Figure S16. | HR-ESIMS of compound <b>2</b> .....                                                      | 18 |
| Figure S17. | <sup>1</sup> H NMR (400 MHz, CDCl <sub>3</sub> ) of compound <b>3</b> .....              | 19 |
| Figure S18. | <sup>13</sup> C NMR (100 MHz, CDCl <sub>3</sub> ) of compound <b>3</b> .....             | 20 |
| Figure S19. | DEPT-135 (100 MHz, CDCl <sub>3</sub> ) of compound <b>3</b> .....                        | 21 |
| Figure S20. | <sup>1</sup> H- <sup>1</sup> H COSY NMR (CDCl <sub>3</sub> ) of compound <b>3</b> .....  | 22 |
| Figure S21. | <sup>1</sup> H- <sup>13</sup> C HSQC NMR (CDCl <sub>3</sub> ) of compound <b>3</b> ..... | 23 |
| Figure S22. | <sup>1</sup> H- <sup>13</sup> C HMBC NMR (CDCl <sub>3</sub> ) of compound <b>3</b> ..... | 24 |
| Figure S23. | <sup>1</sup> H- <sup>1</sup> H NOESY NMR (CDCl <sub>3</sub> ) of compound <b>3</b> ..... | 25 |
| Figure S24. | HR-ESIMS of compound <b>3</b> .....                                                      | 26 |

Figure S1. <sup>1</sup>H NMR (400 MHz, CDCl<sub>3</sub>) of compound **1**

Sub3+4H-1  
Sub3+4H-1

5.90  
5.90  
5.90  
5.89

5.37  
5.37  
5.36  
5.21

2.83  
2.42  
2.42  
2.39  
2.39  
2.37  
2.36  
2.36  
2.35  
2.35  
2.32  
2.32  
2.28  
2.28  
2.22  
2.21  
2.20  
2.19  
2.18  
2.17  
2.16  
2.16  
2.15  
2.12  
2.11  
1.93  
1.93  
1.92  
1.81  
1.81  
1.78  
1.77  
1.75  
1.74  
1.57  
1.54  
1.54  
1.50  
1.46  
1.45  
1.43  
1.42

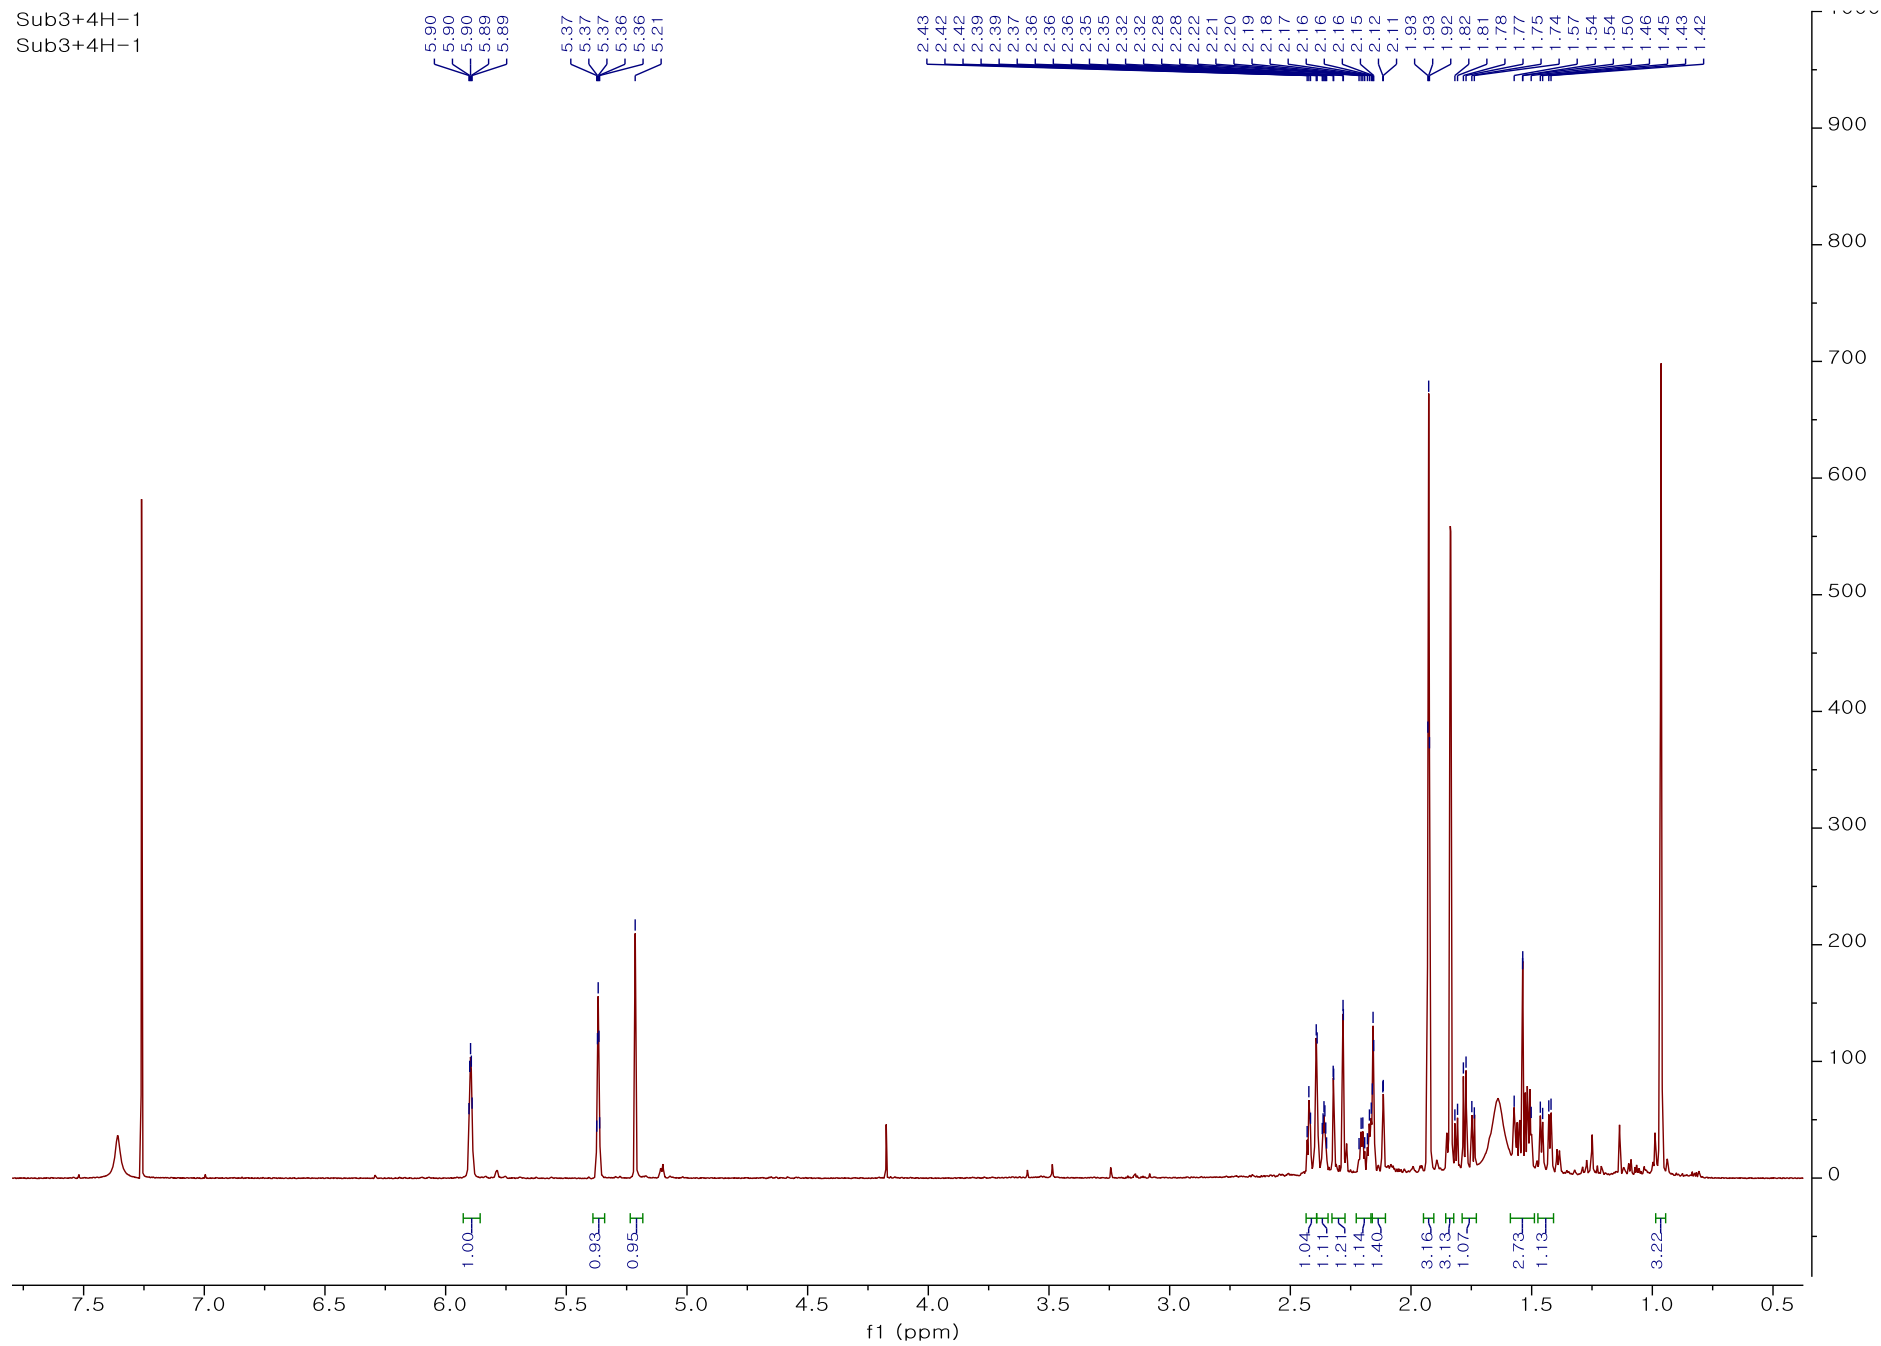

Figure S2.  $^{13}\text{C}$  NMR (100 MHz,  $\text{CDCl}_3$ ) of compound **1**

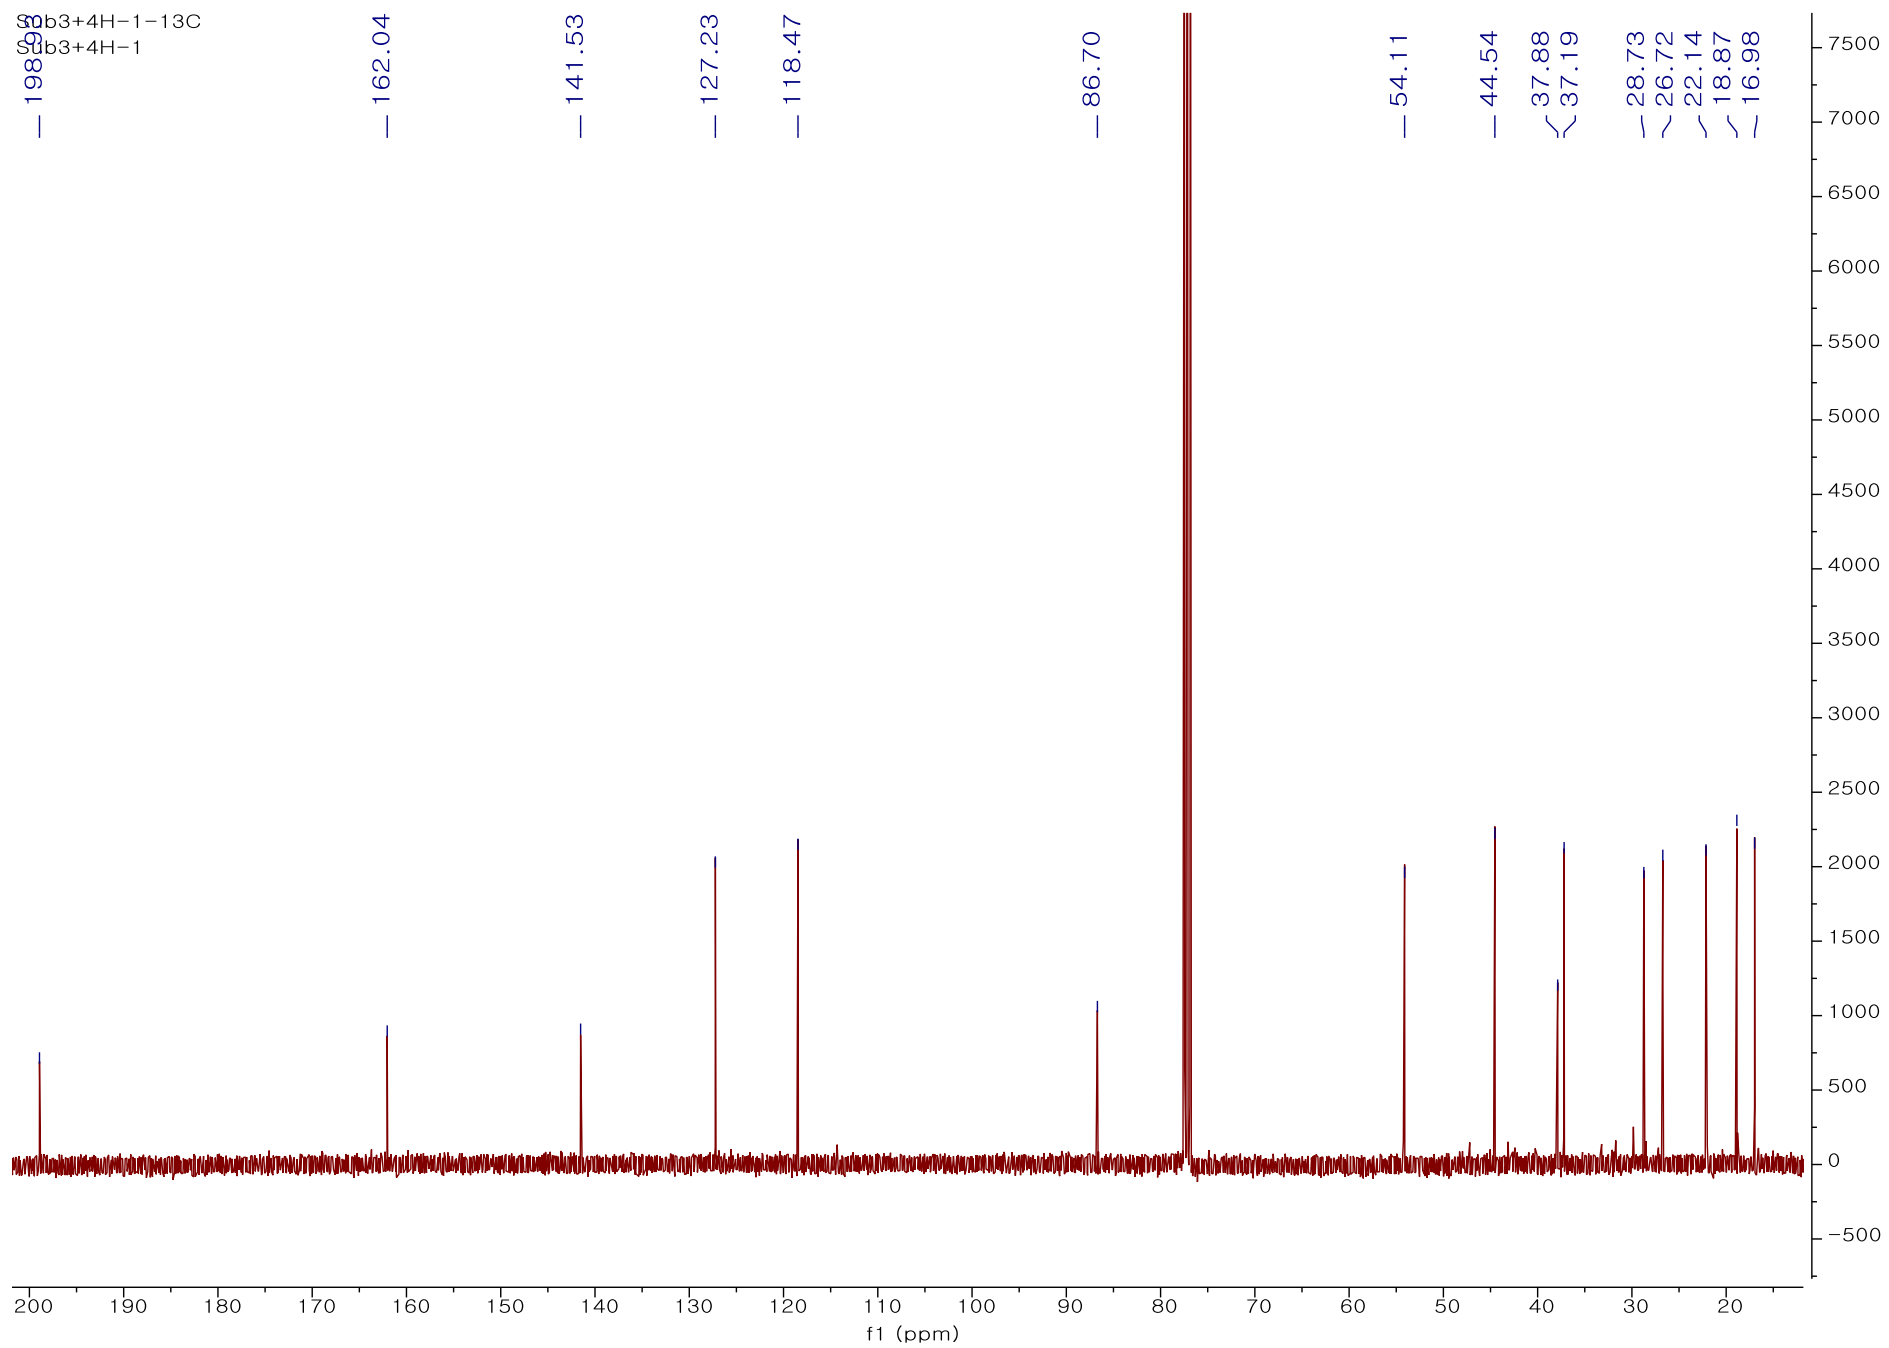

Figure S3. DEPT-135 NMR (100 MHz, CDCl<sub>3</sub>) of compound **1**

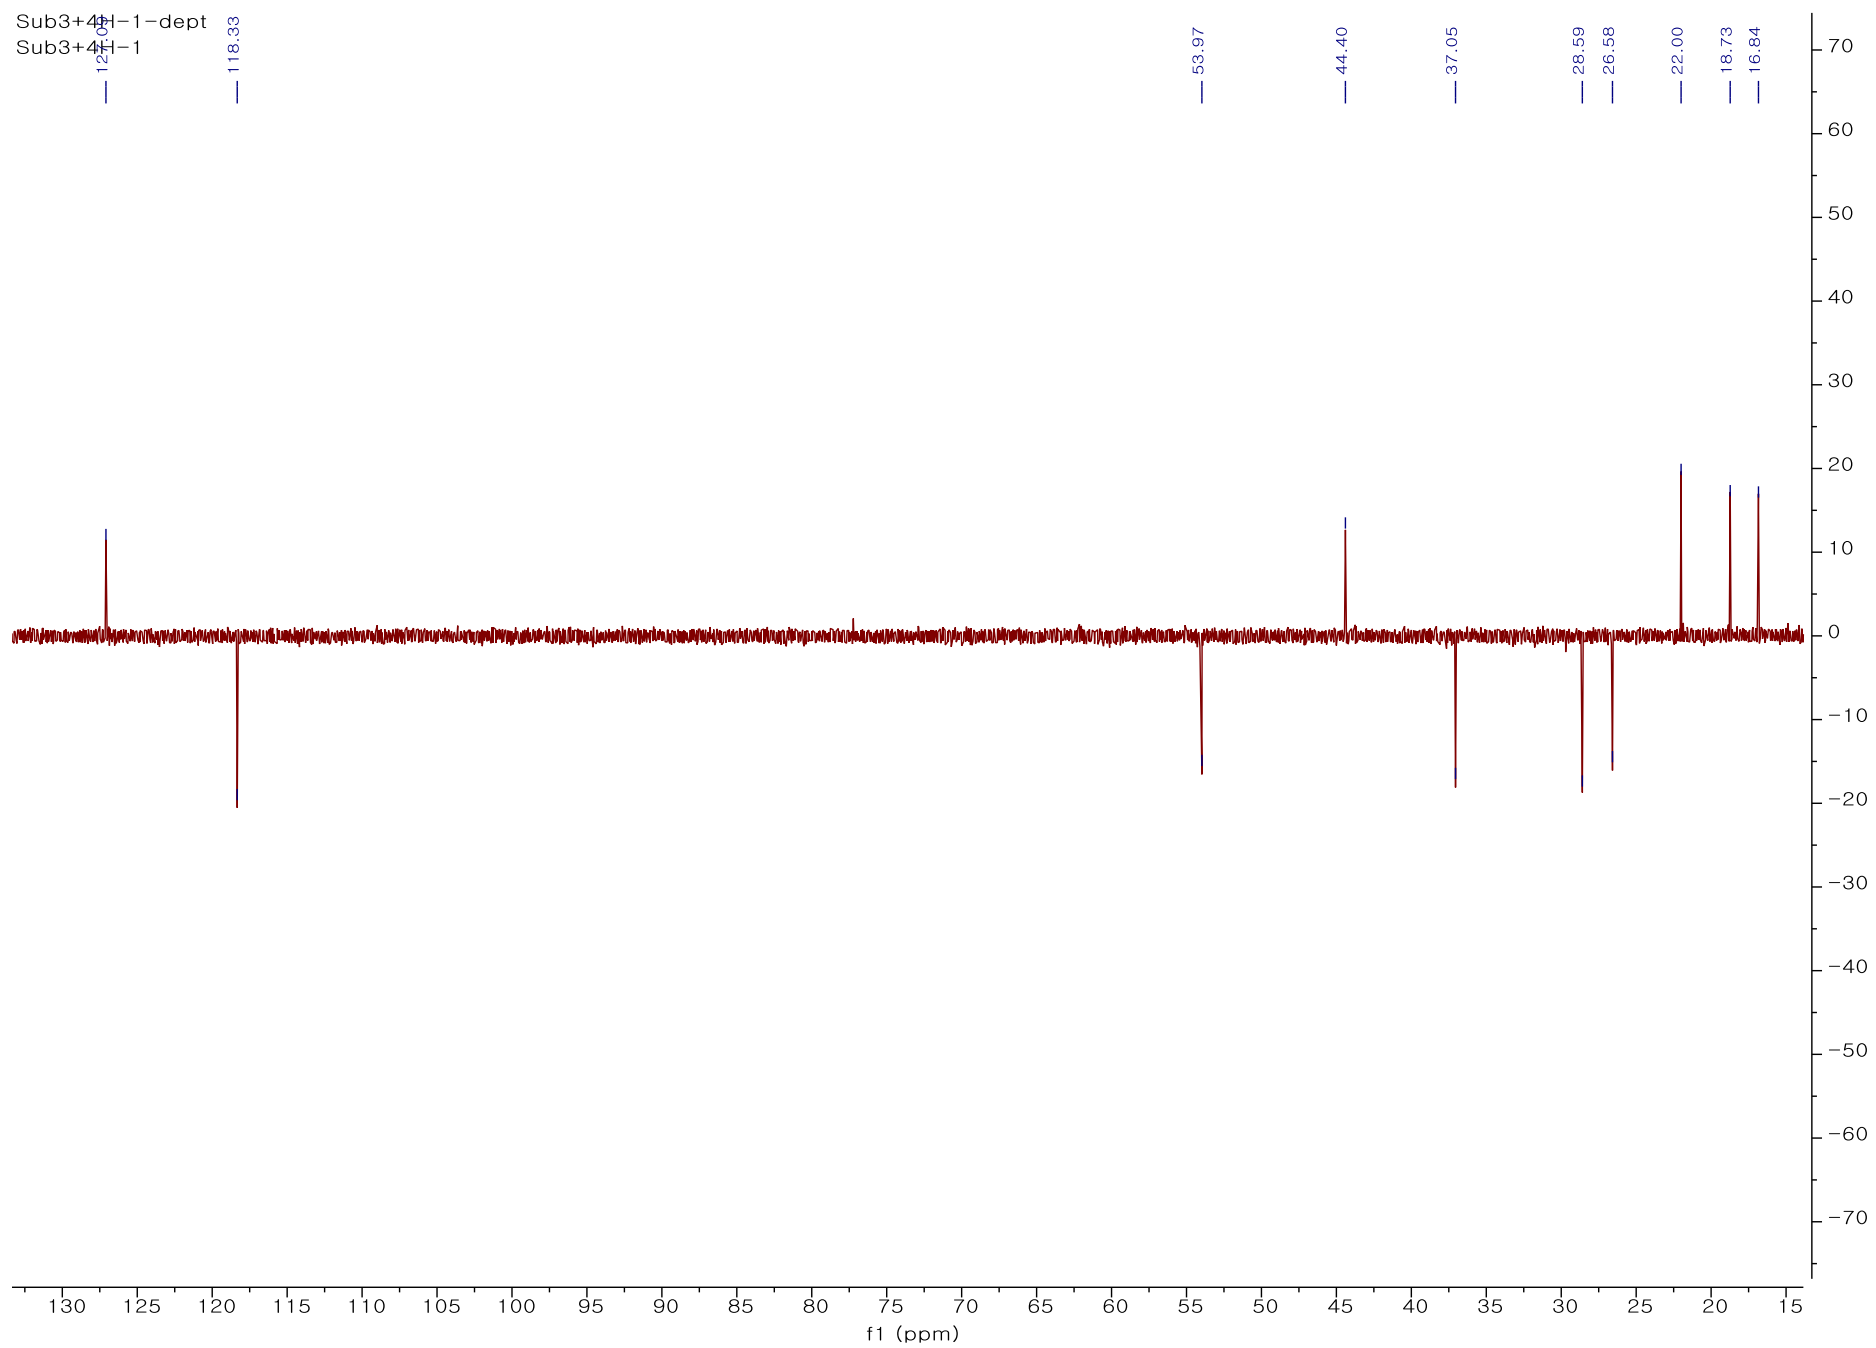

Figure S4.  $^1\text{H}$ - $^1\text{H}$  COSY NMR ( $\text{CDCl}_3$ ) of compound **1**

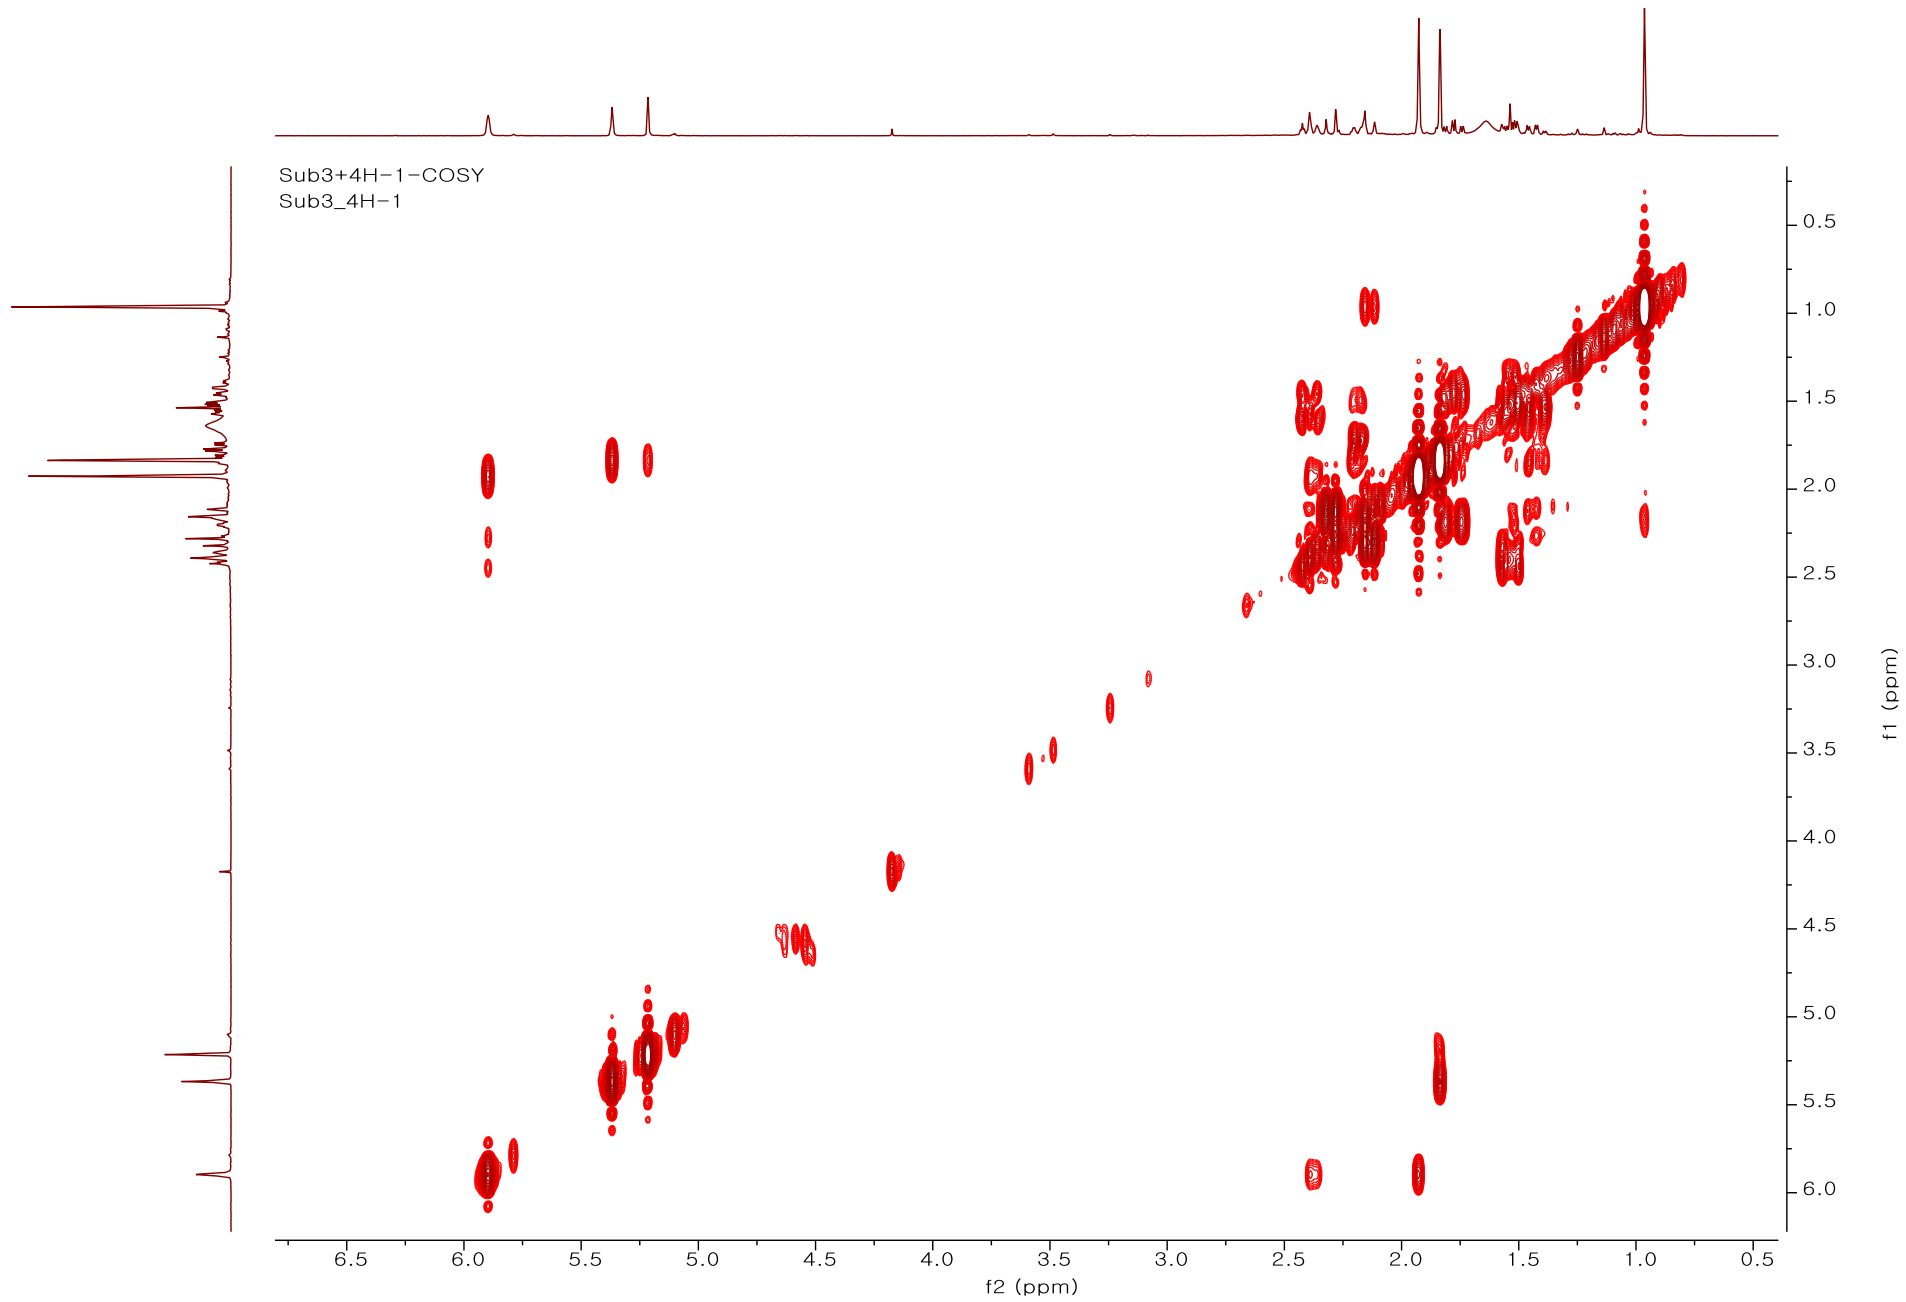

Figure S5.  $^1\text{H}$ - $^{13}\text{C}$  HSQC NMR ( $\text{CDCl}_3$ ) of compound **1**

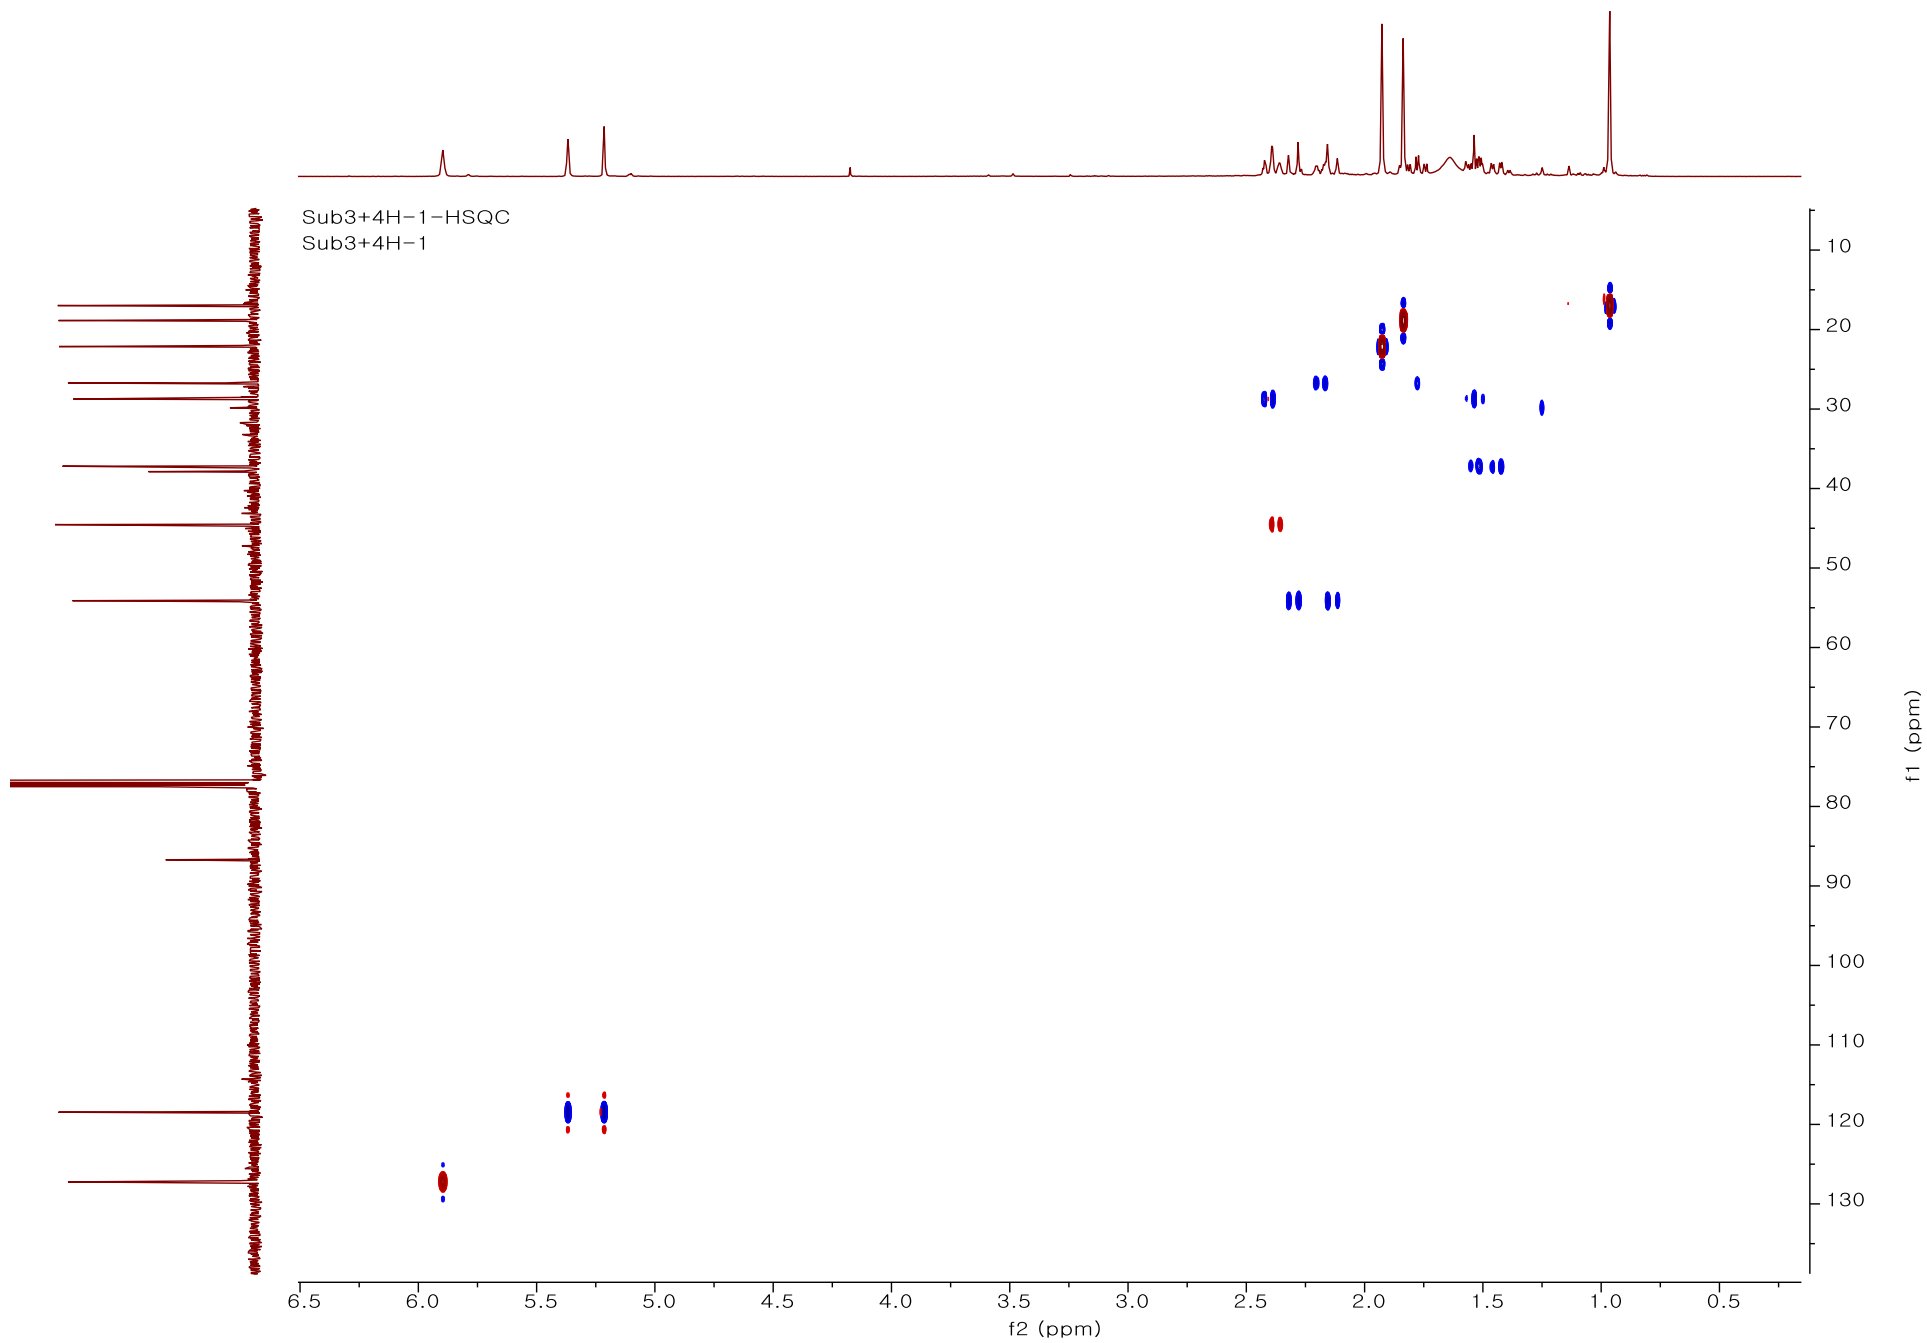

Figure S6.  $^1\text{H}$ - $^{13}\text{C}$  HMBC NMR ( $\text{CDCl}_3$ ) of compound **1**

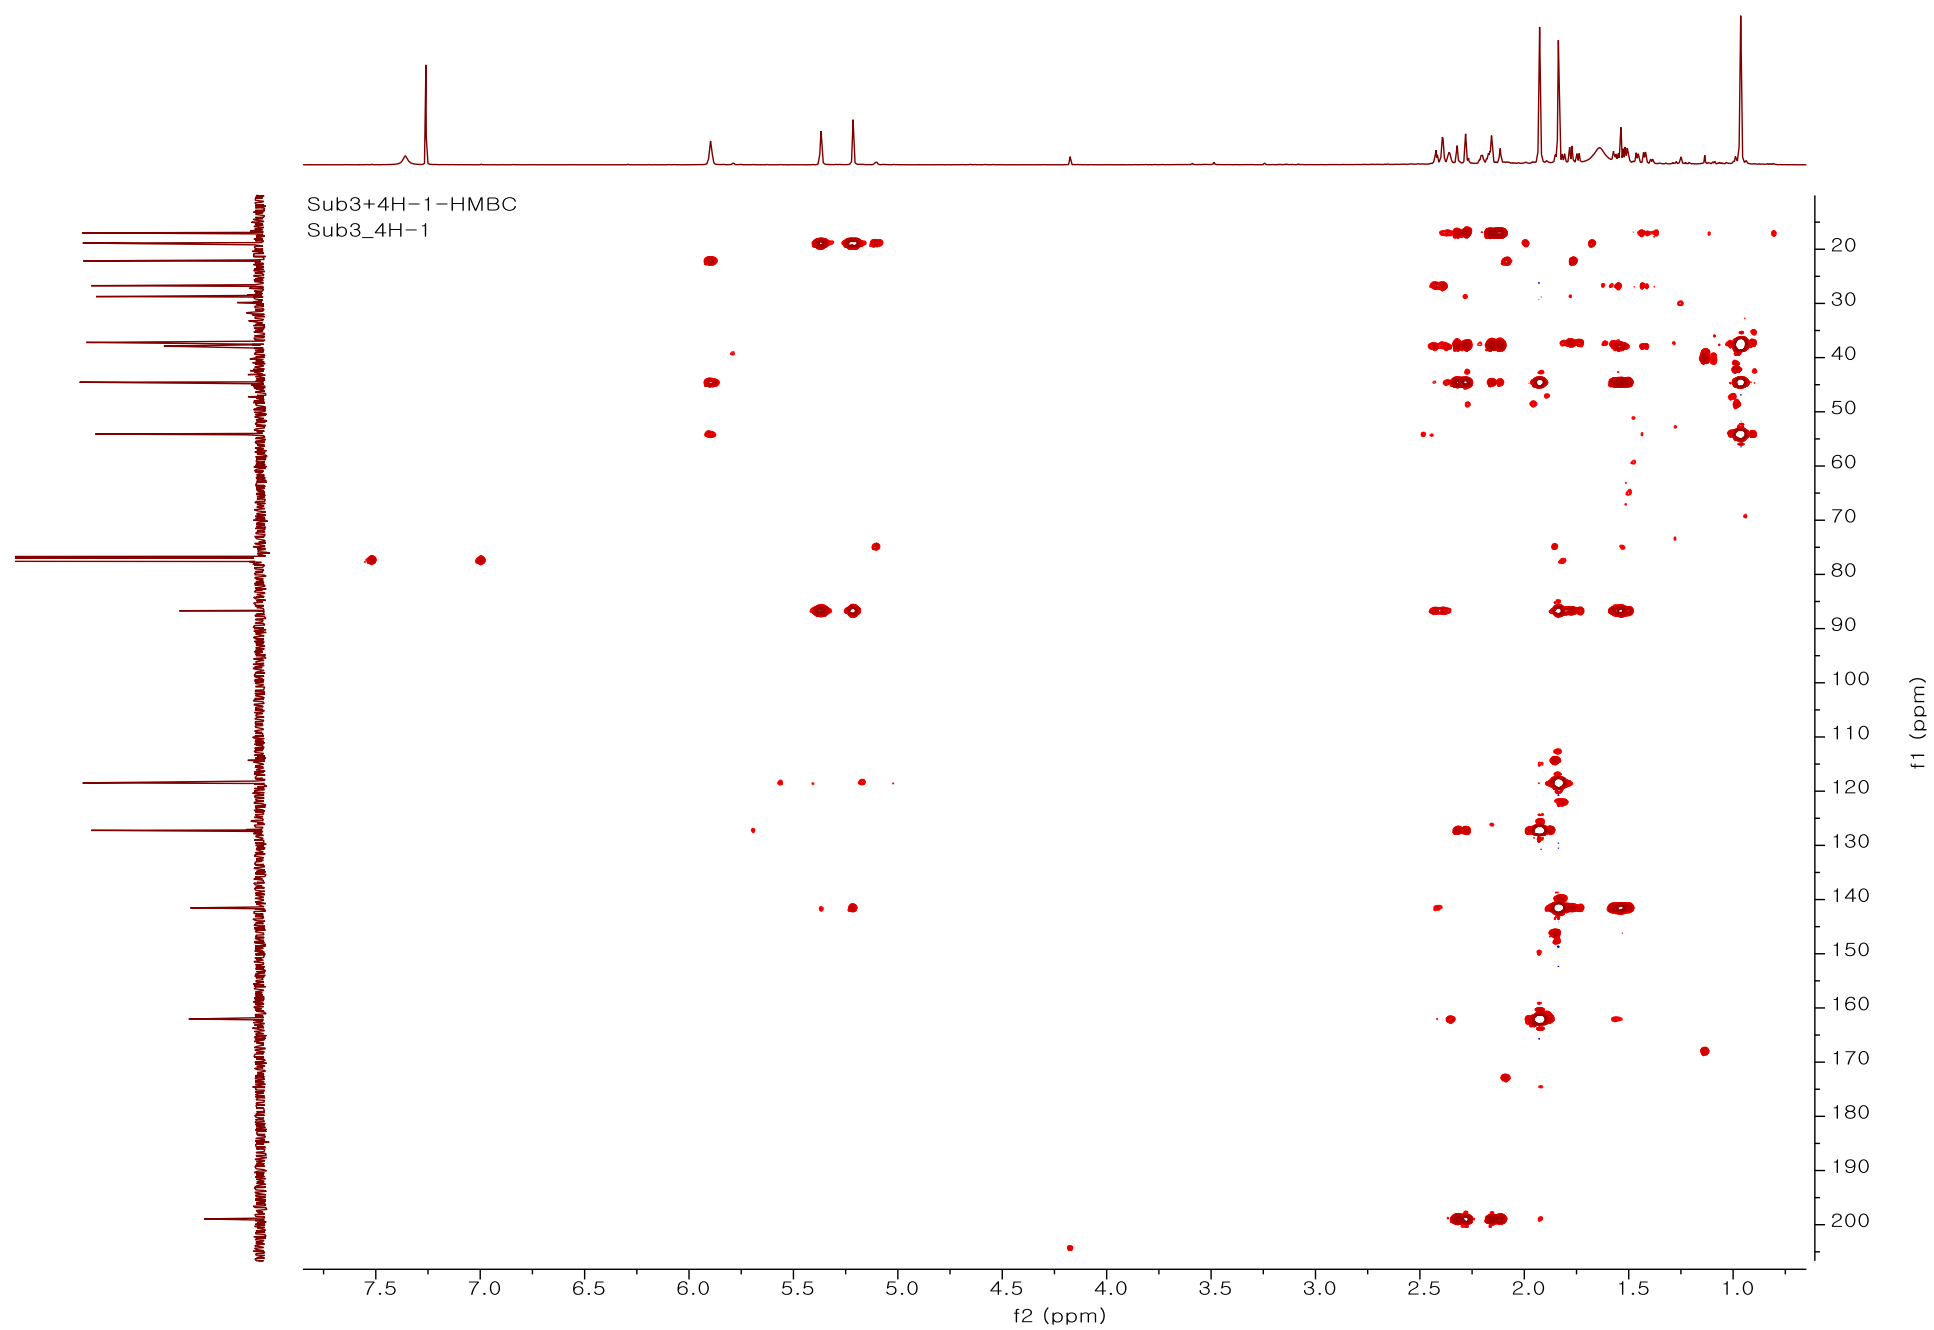



Figure S7.  $^1\text{H}$ - $^1\text{H}$  NOESY NMR ( $\text{CDCl}_3$ ) of compound **1**

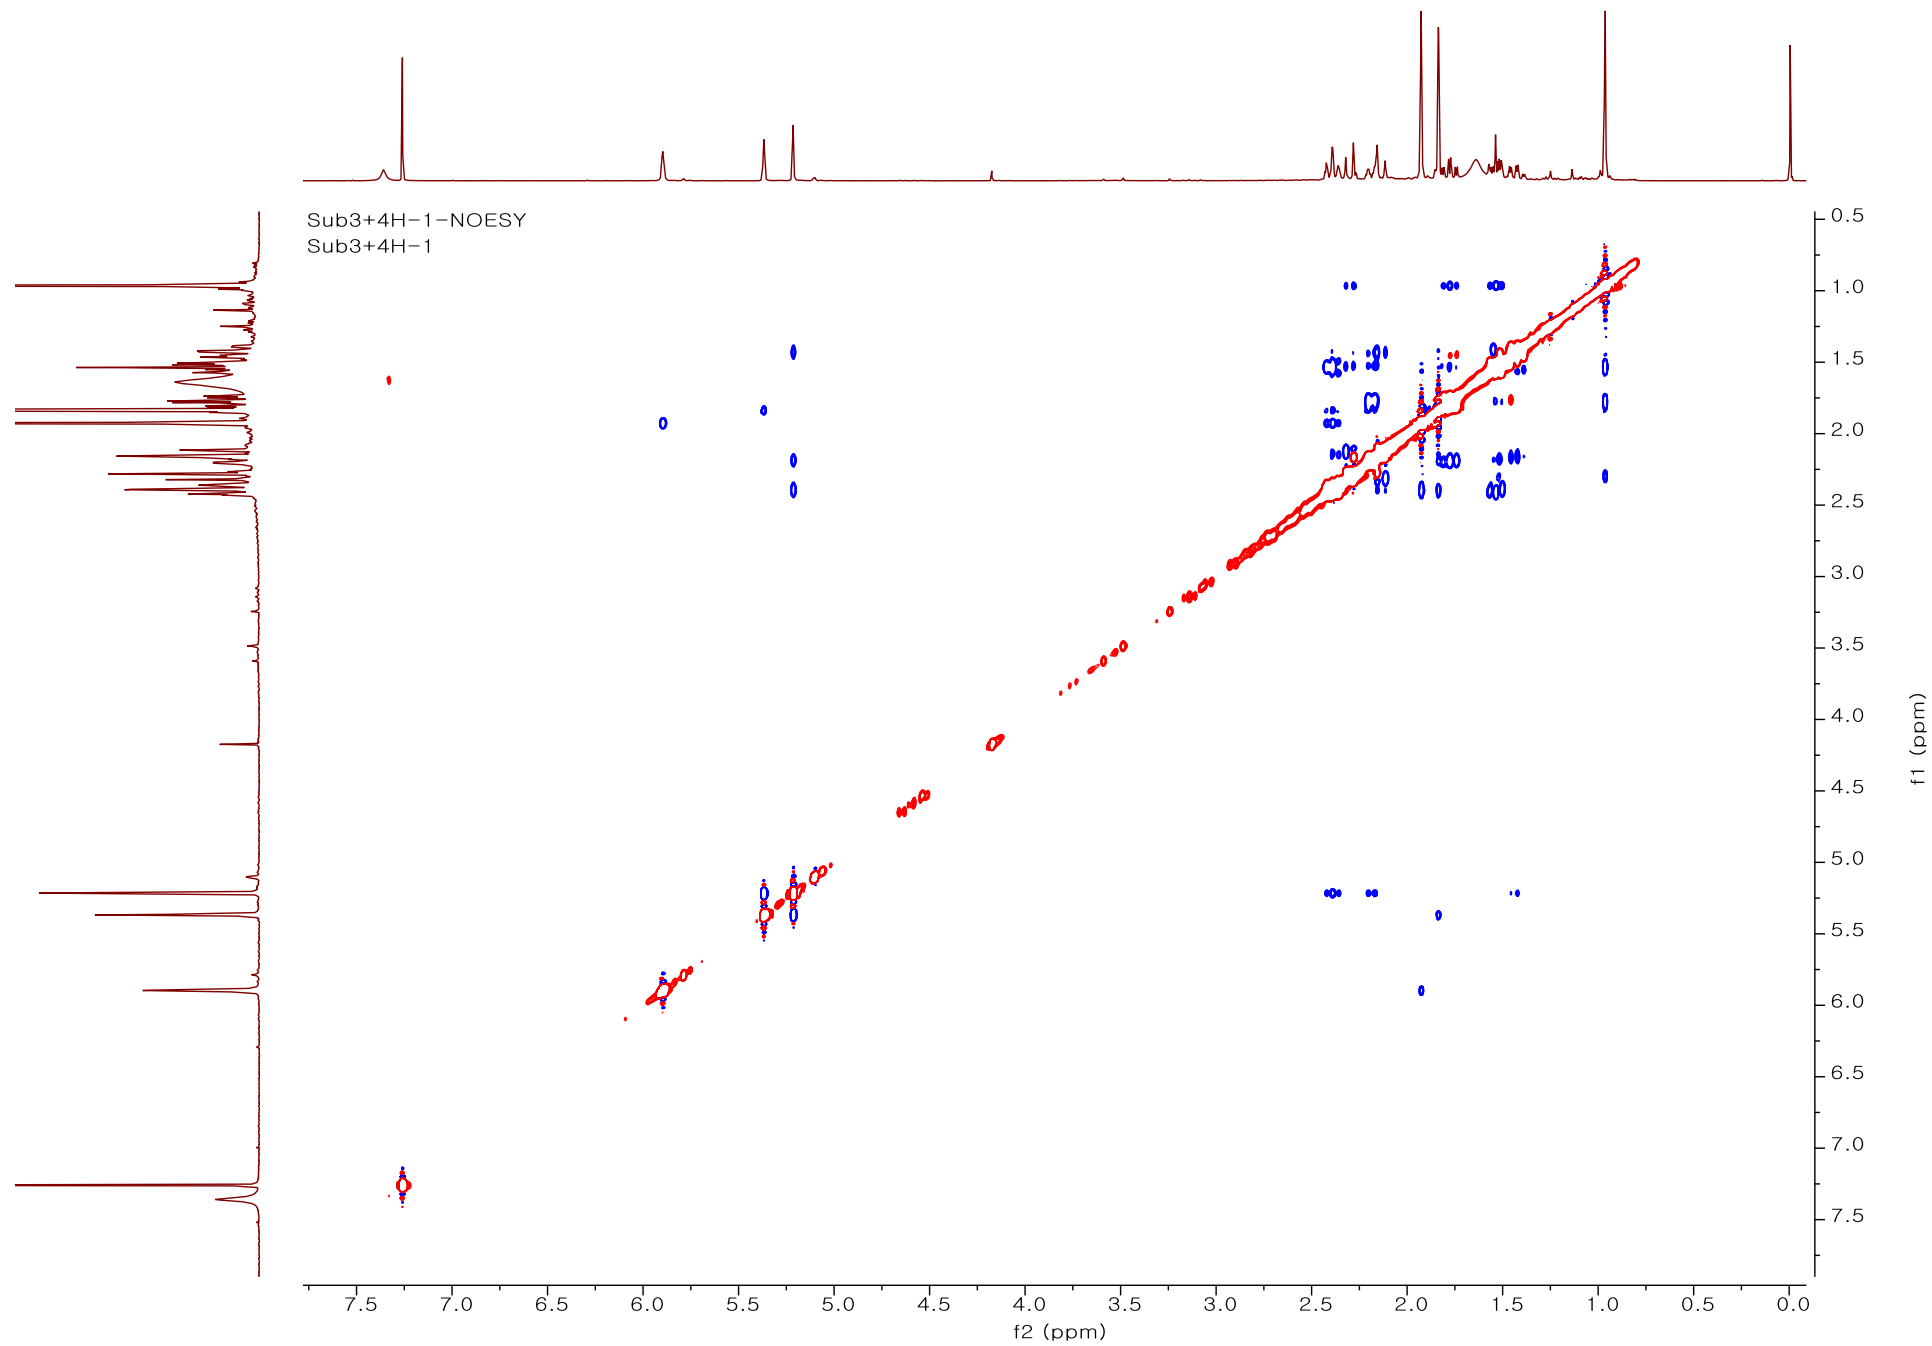

Figure S8. HR-ESIMS of compound 1

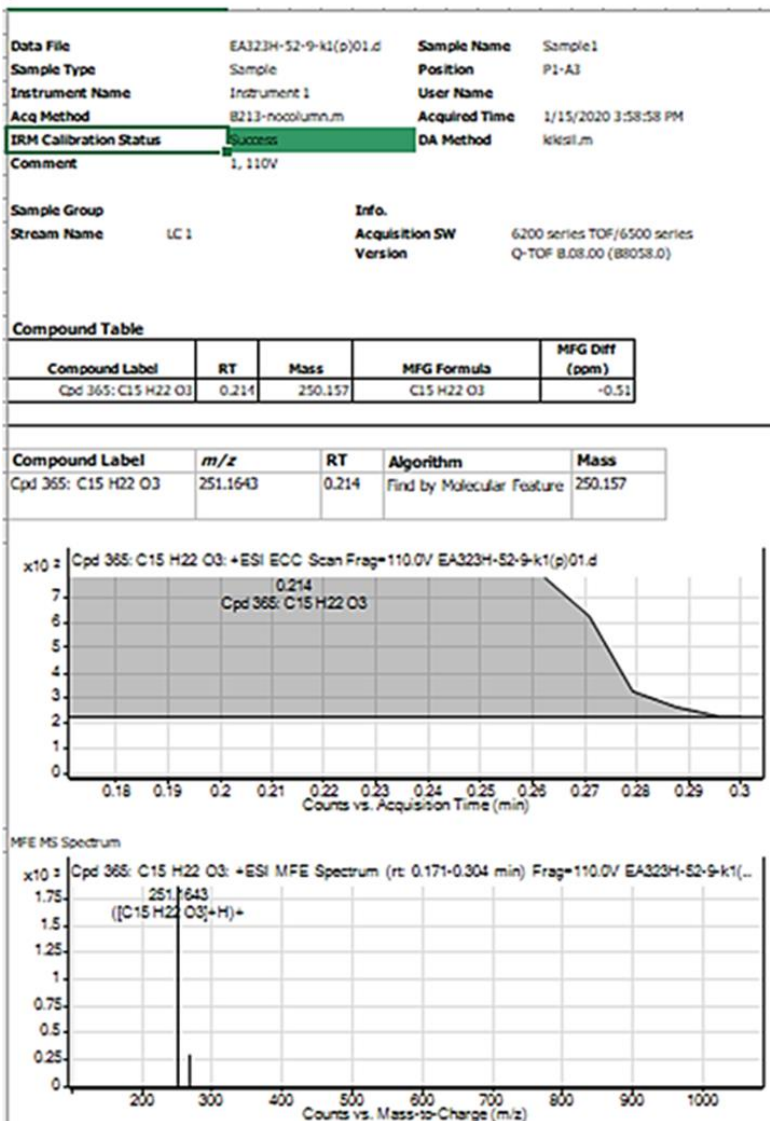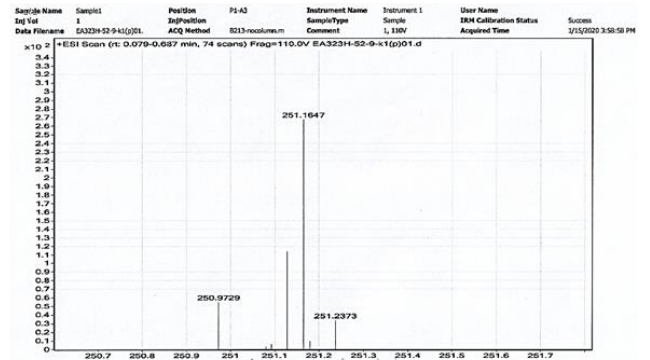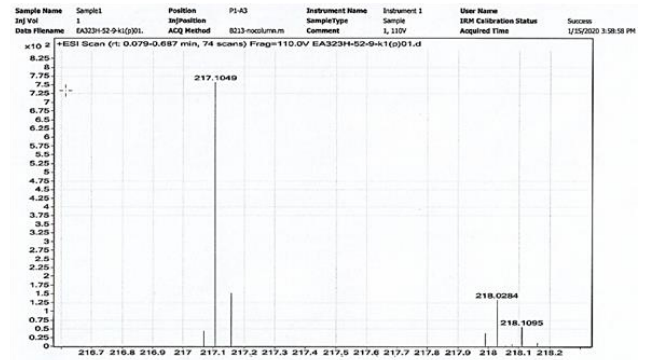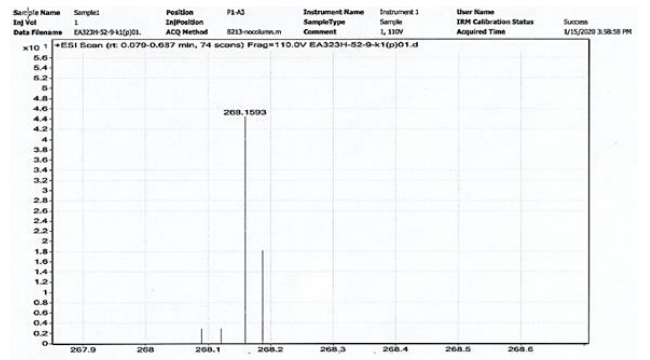

Figure S9.  $^1\text{H}$  NMR (400 MHz,  $\text{CDCl}_3$ ) of compound **2**

Sub3+4RP-7  
Sub3+4RP-7

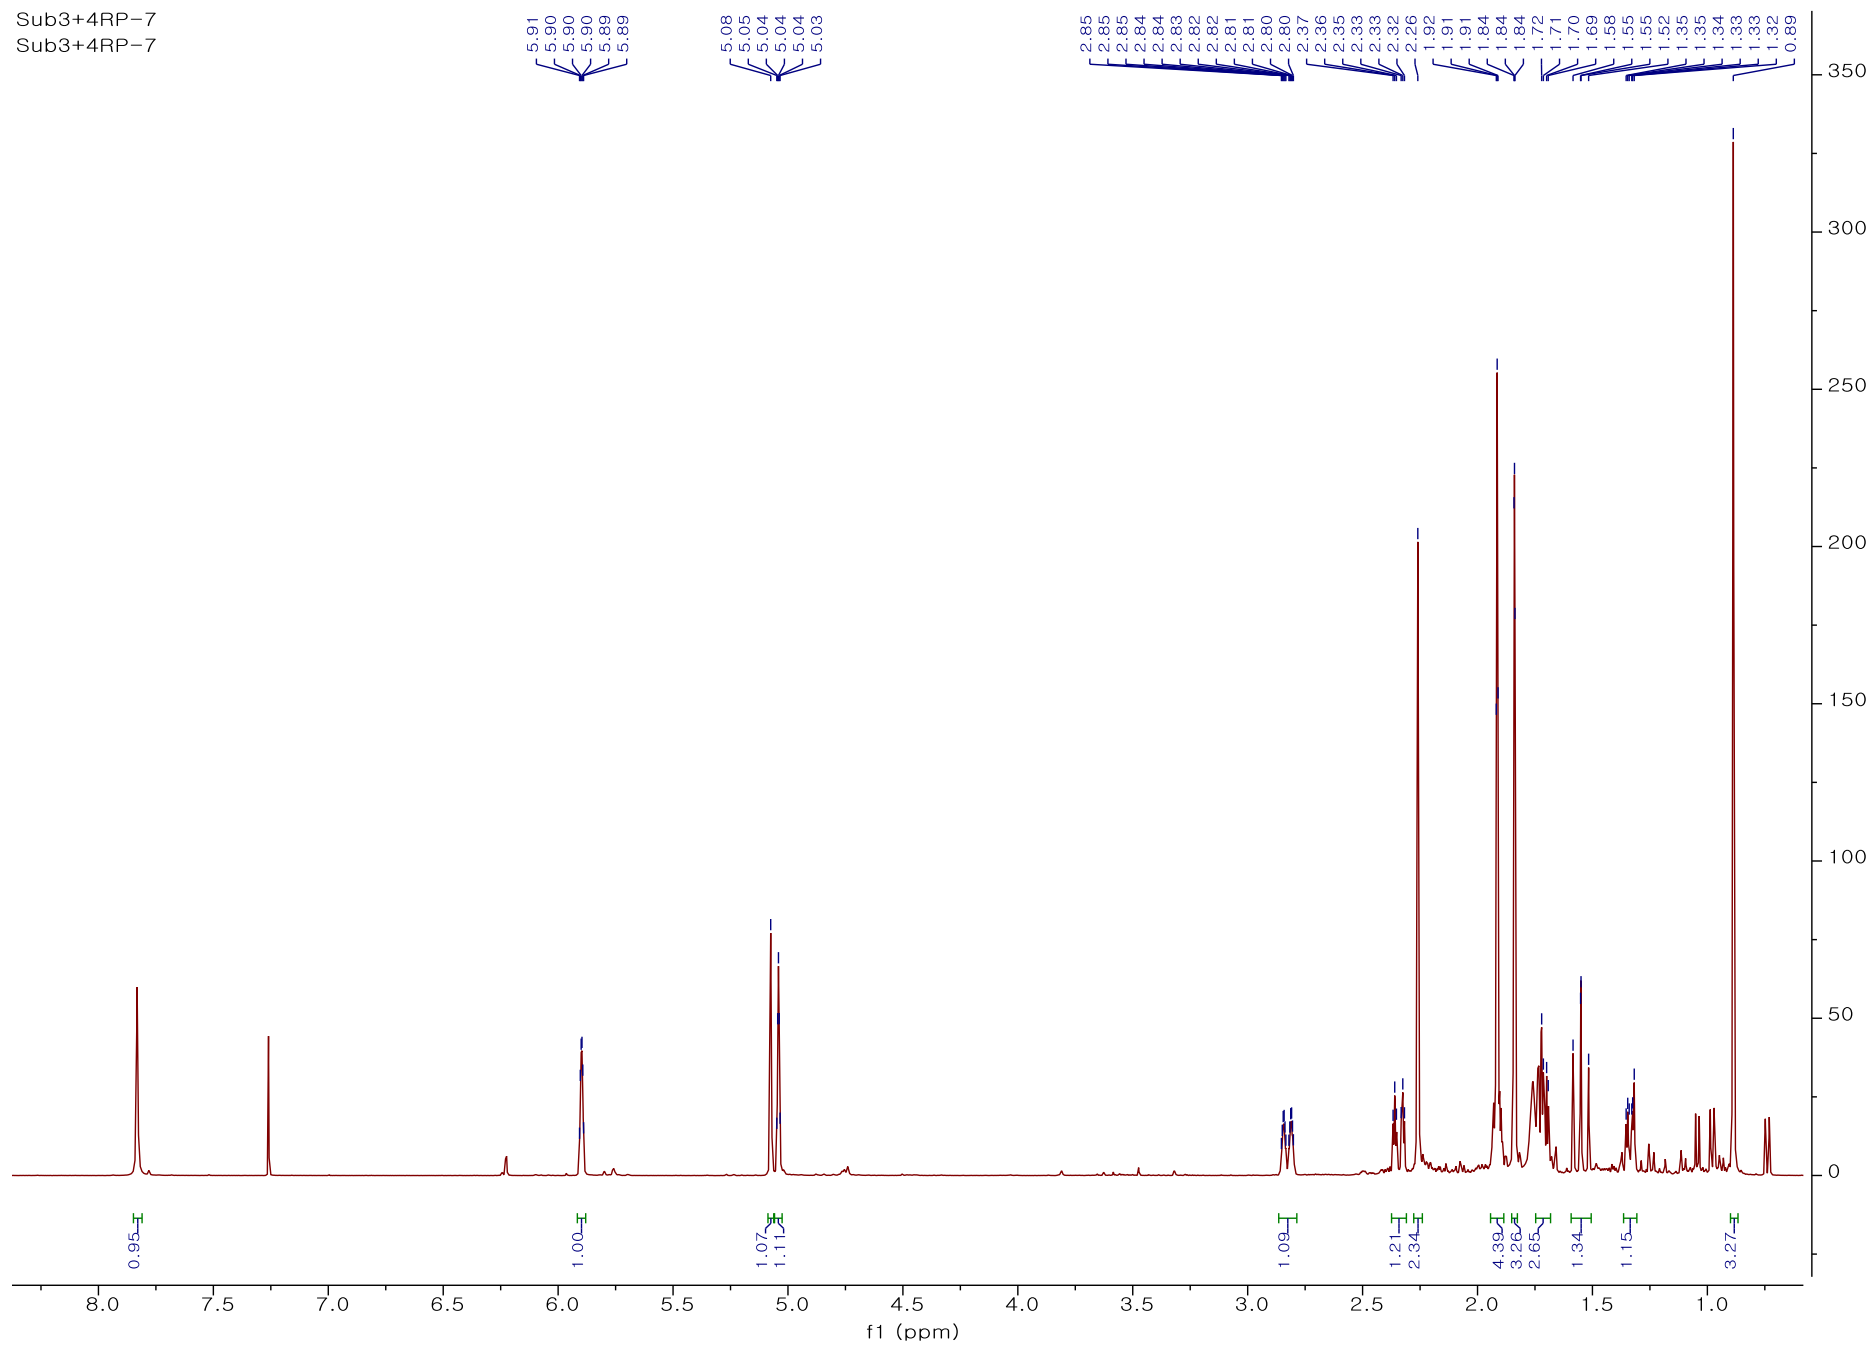

Figure S10.  $^{13}\text{C}$  NMR (150 MHz,  $\text{CDCl}_3$ ) of compound **2**

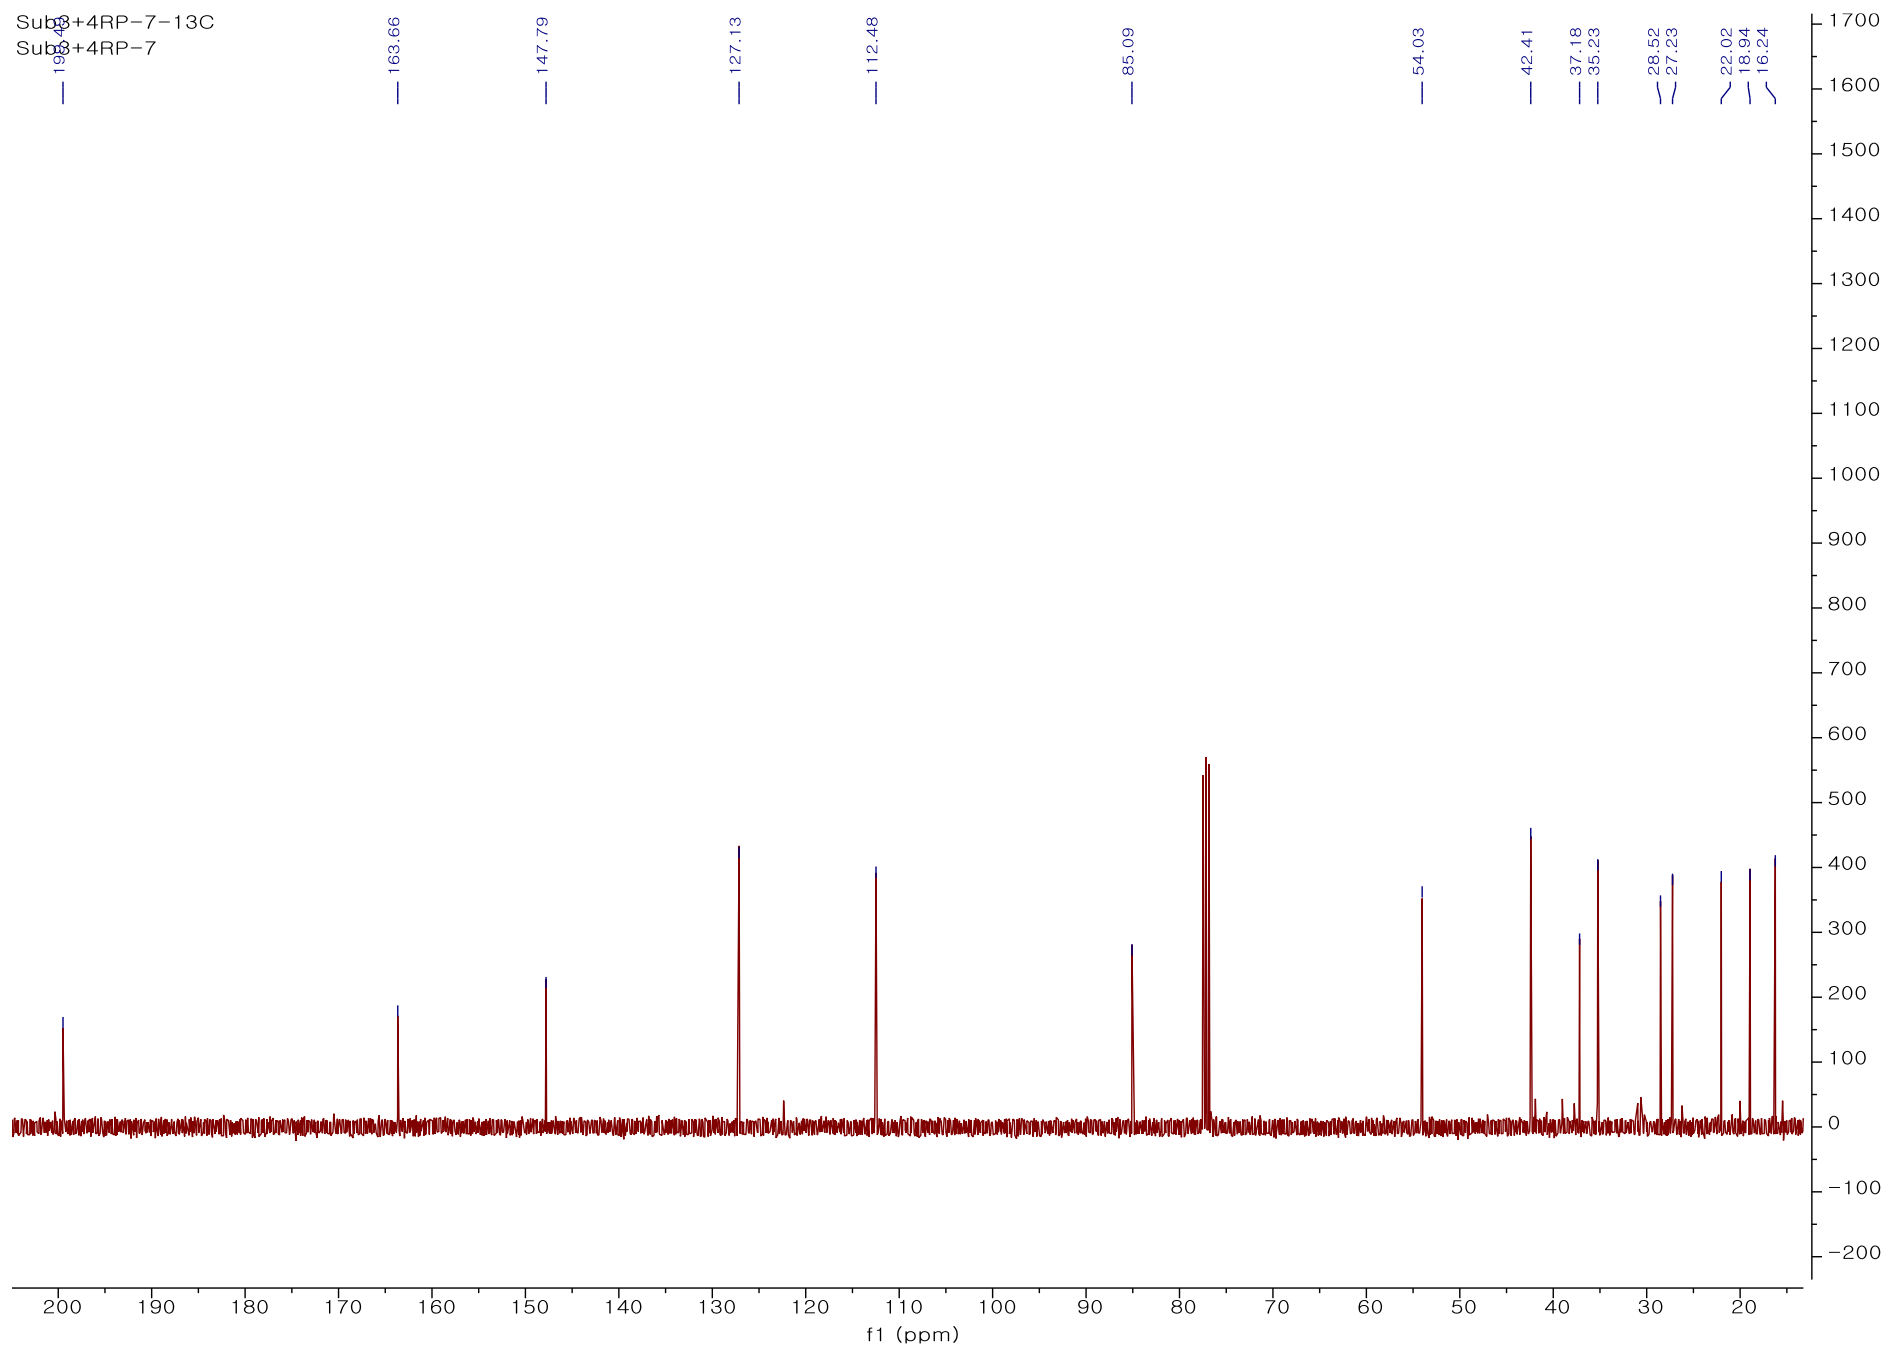

Figure S11. DEPT-135 NMR (150 MHz, CDCl<sub>3</sub>) of compound **2**

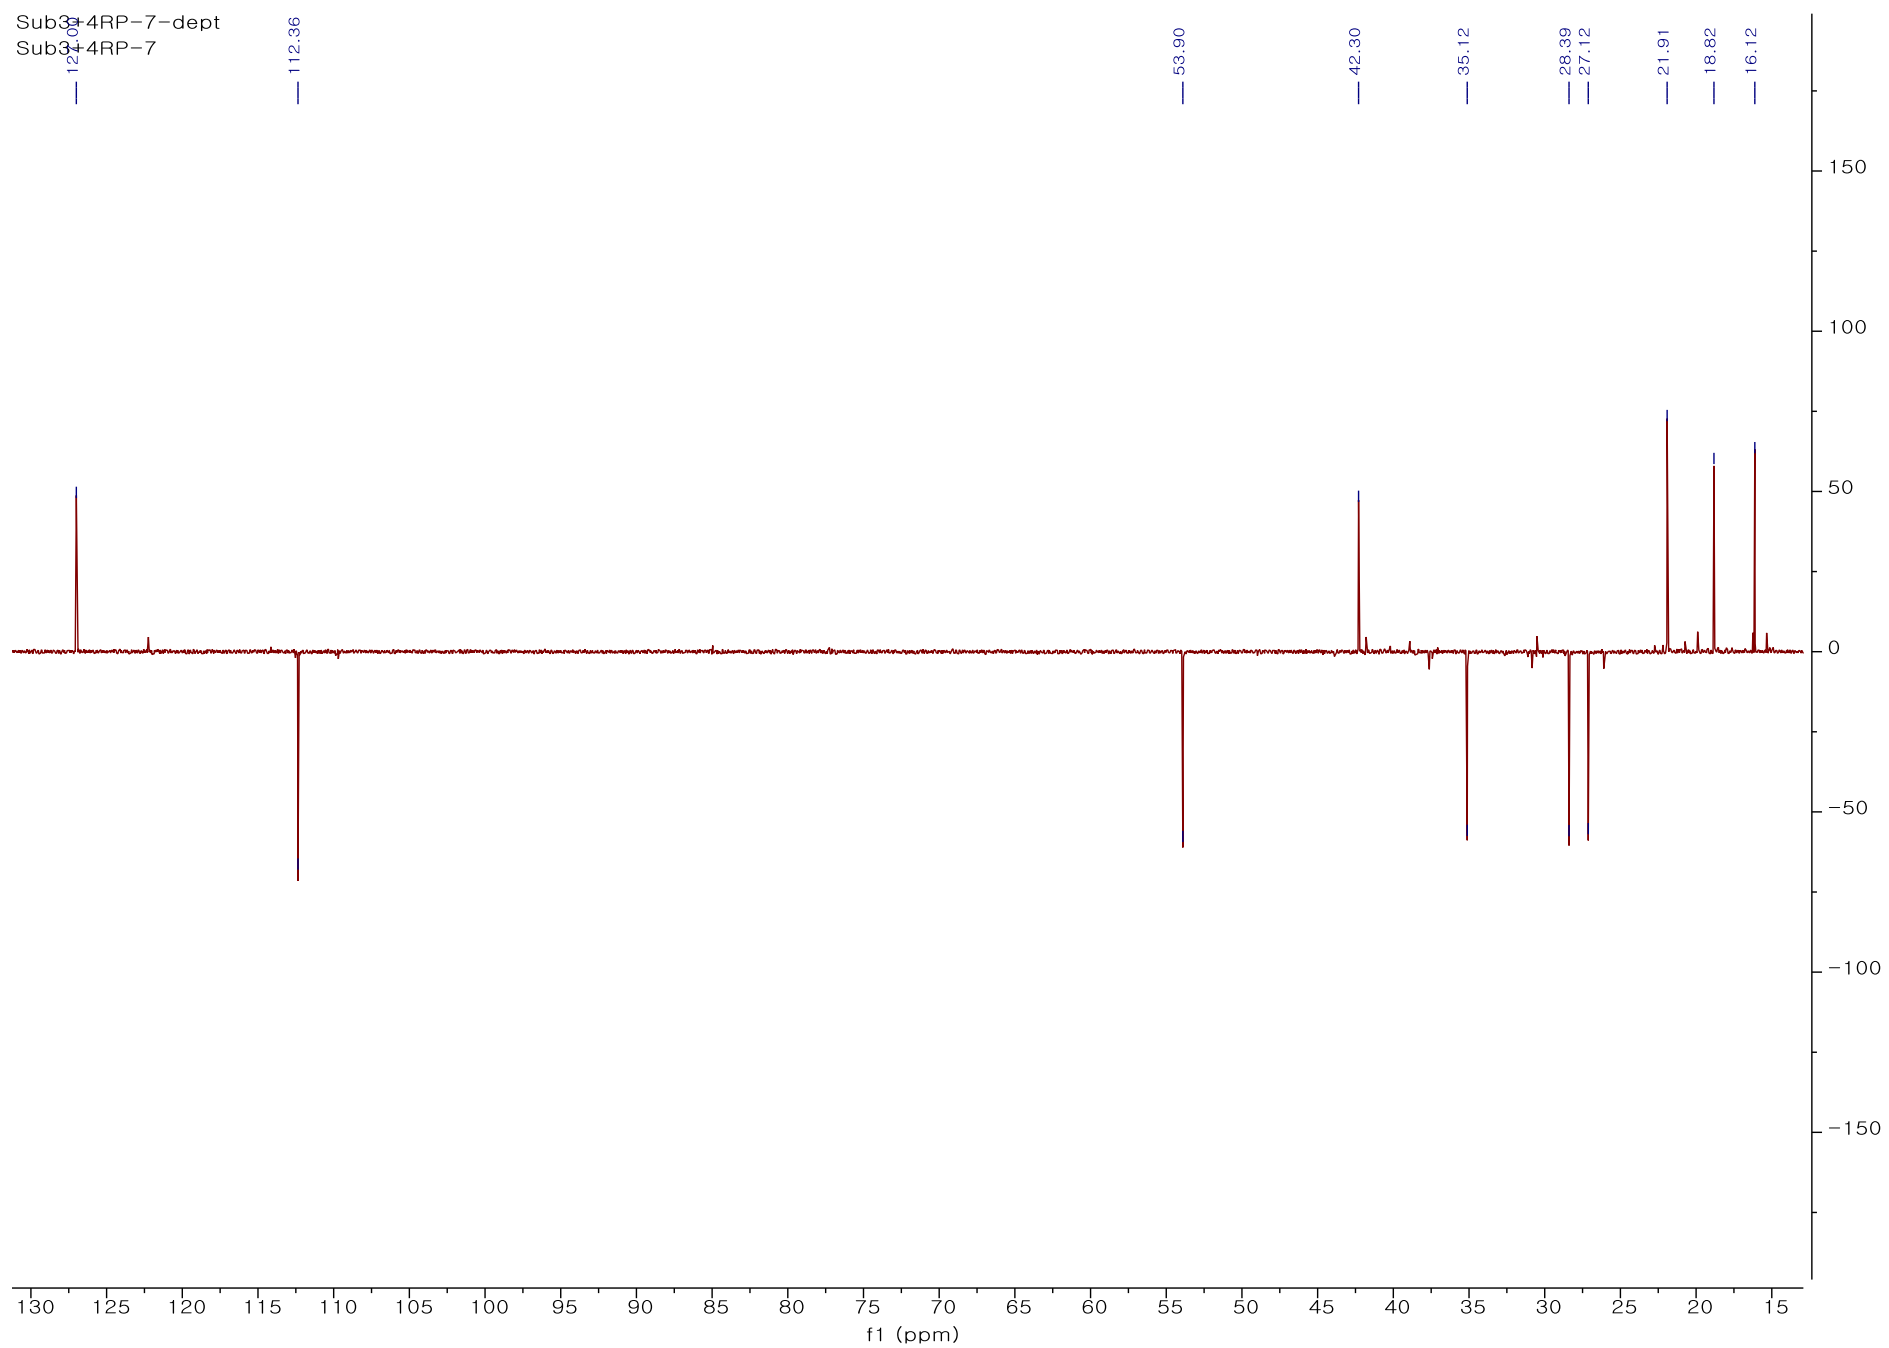

Figure S12.  $^1\text{H}$ - $^1\text{H}$  COSY NMR ( $\text{CDCl}_3$ ) of compound **2**

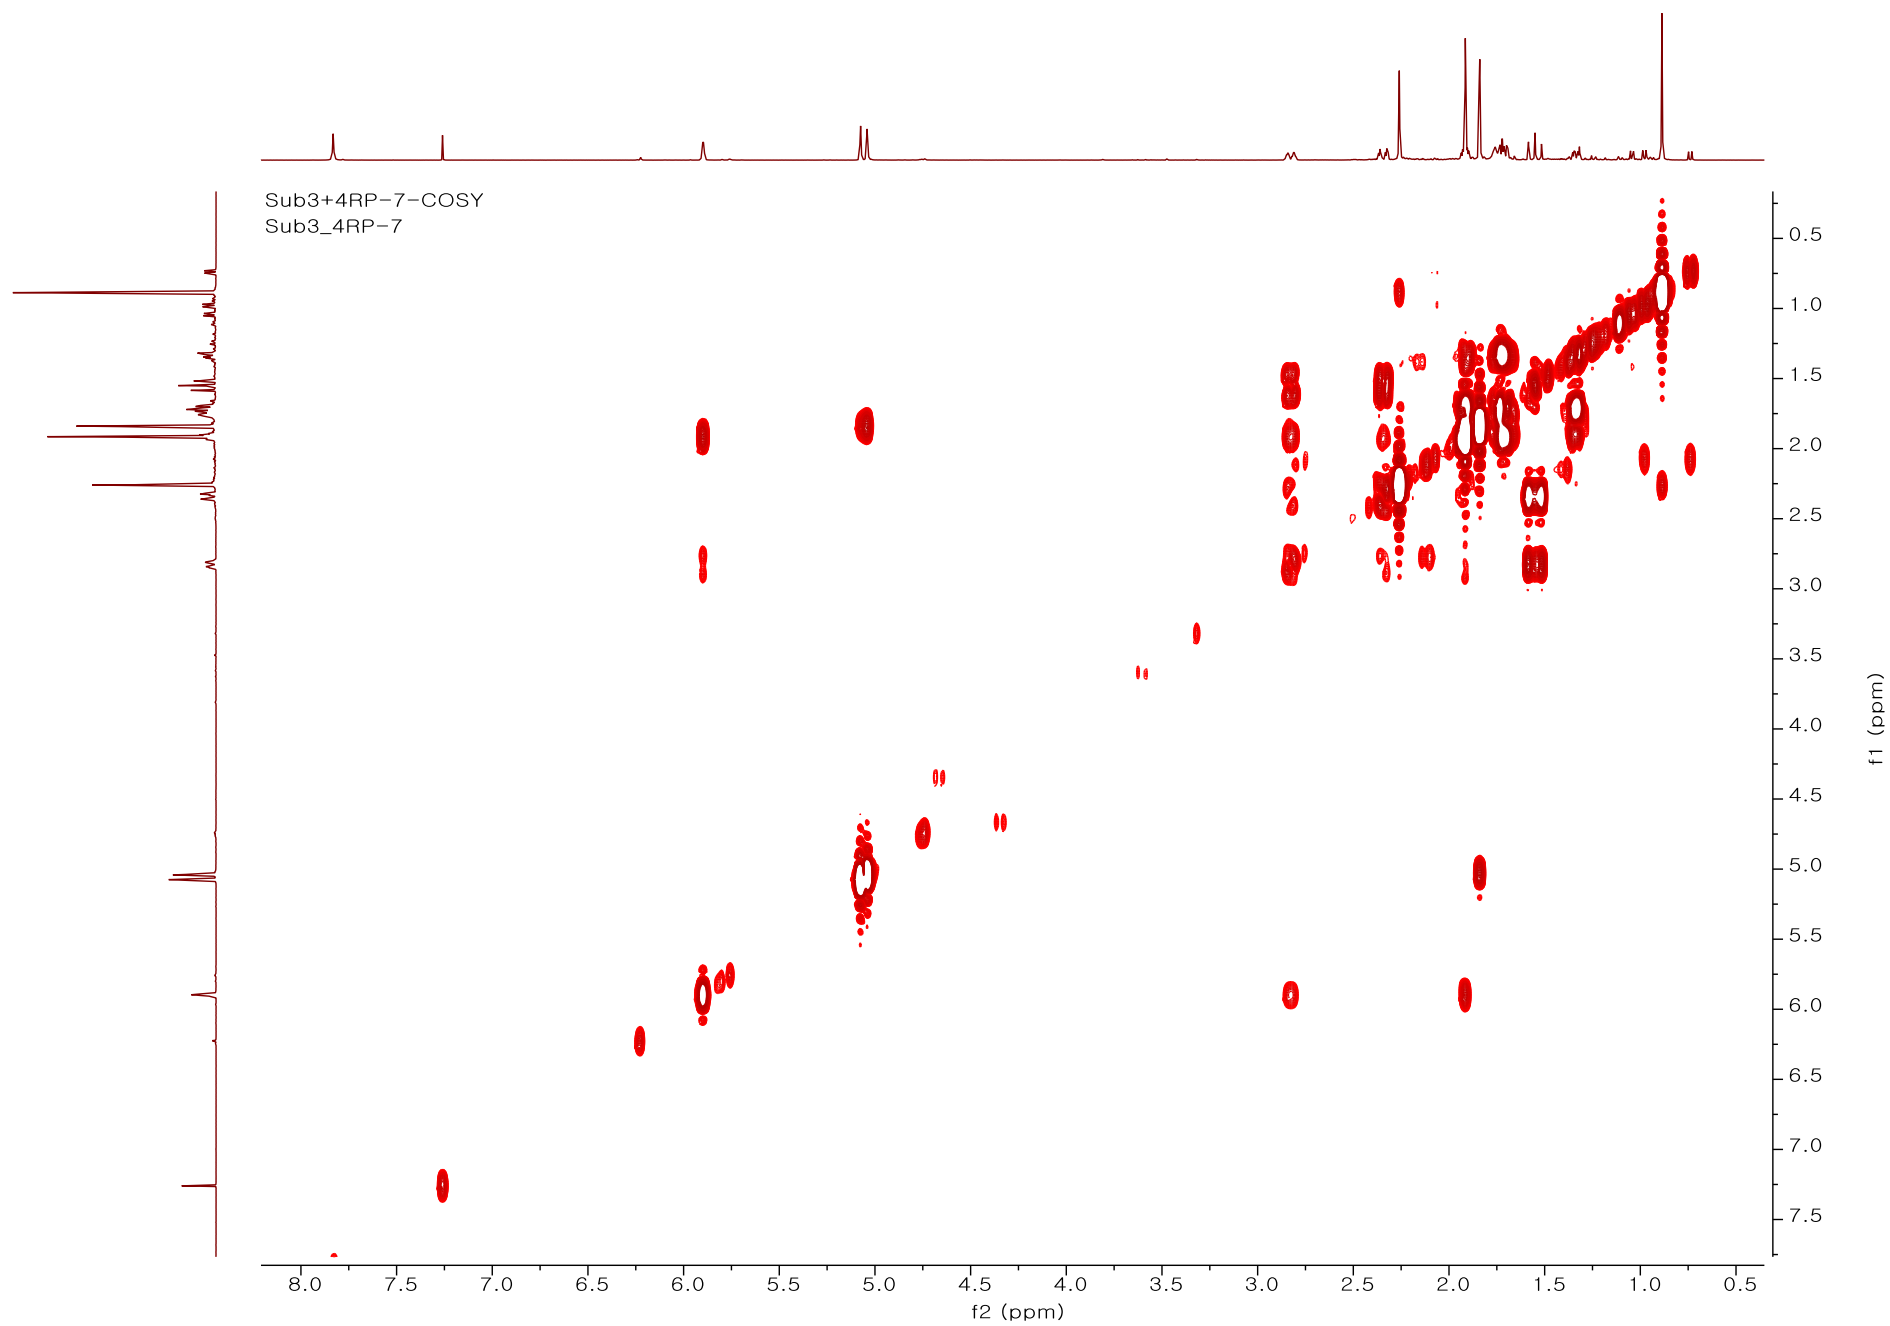

Figure S13.  $^1\text{H}$ - $^{13}\text{C}$  HSQC NMR ( $\text{CDCl}_3$ ) of compound **2**

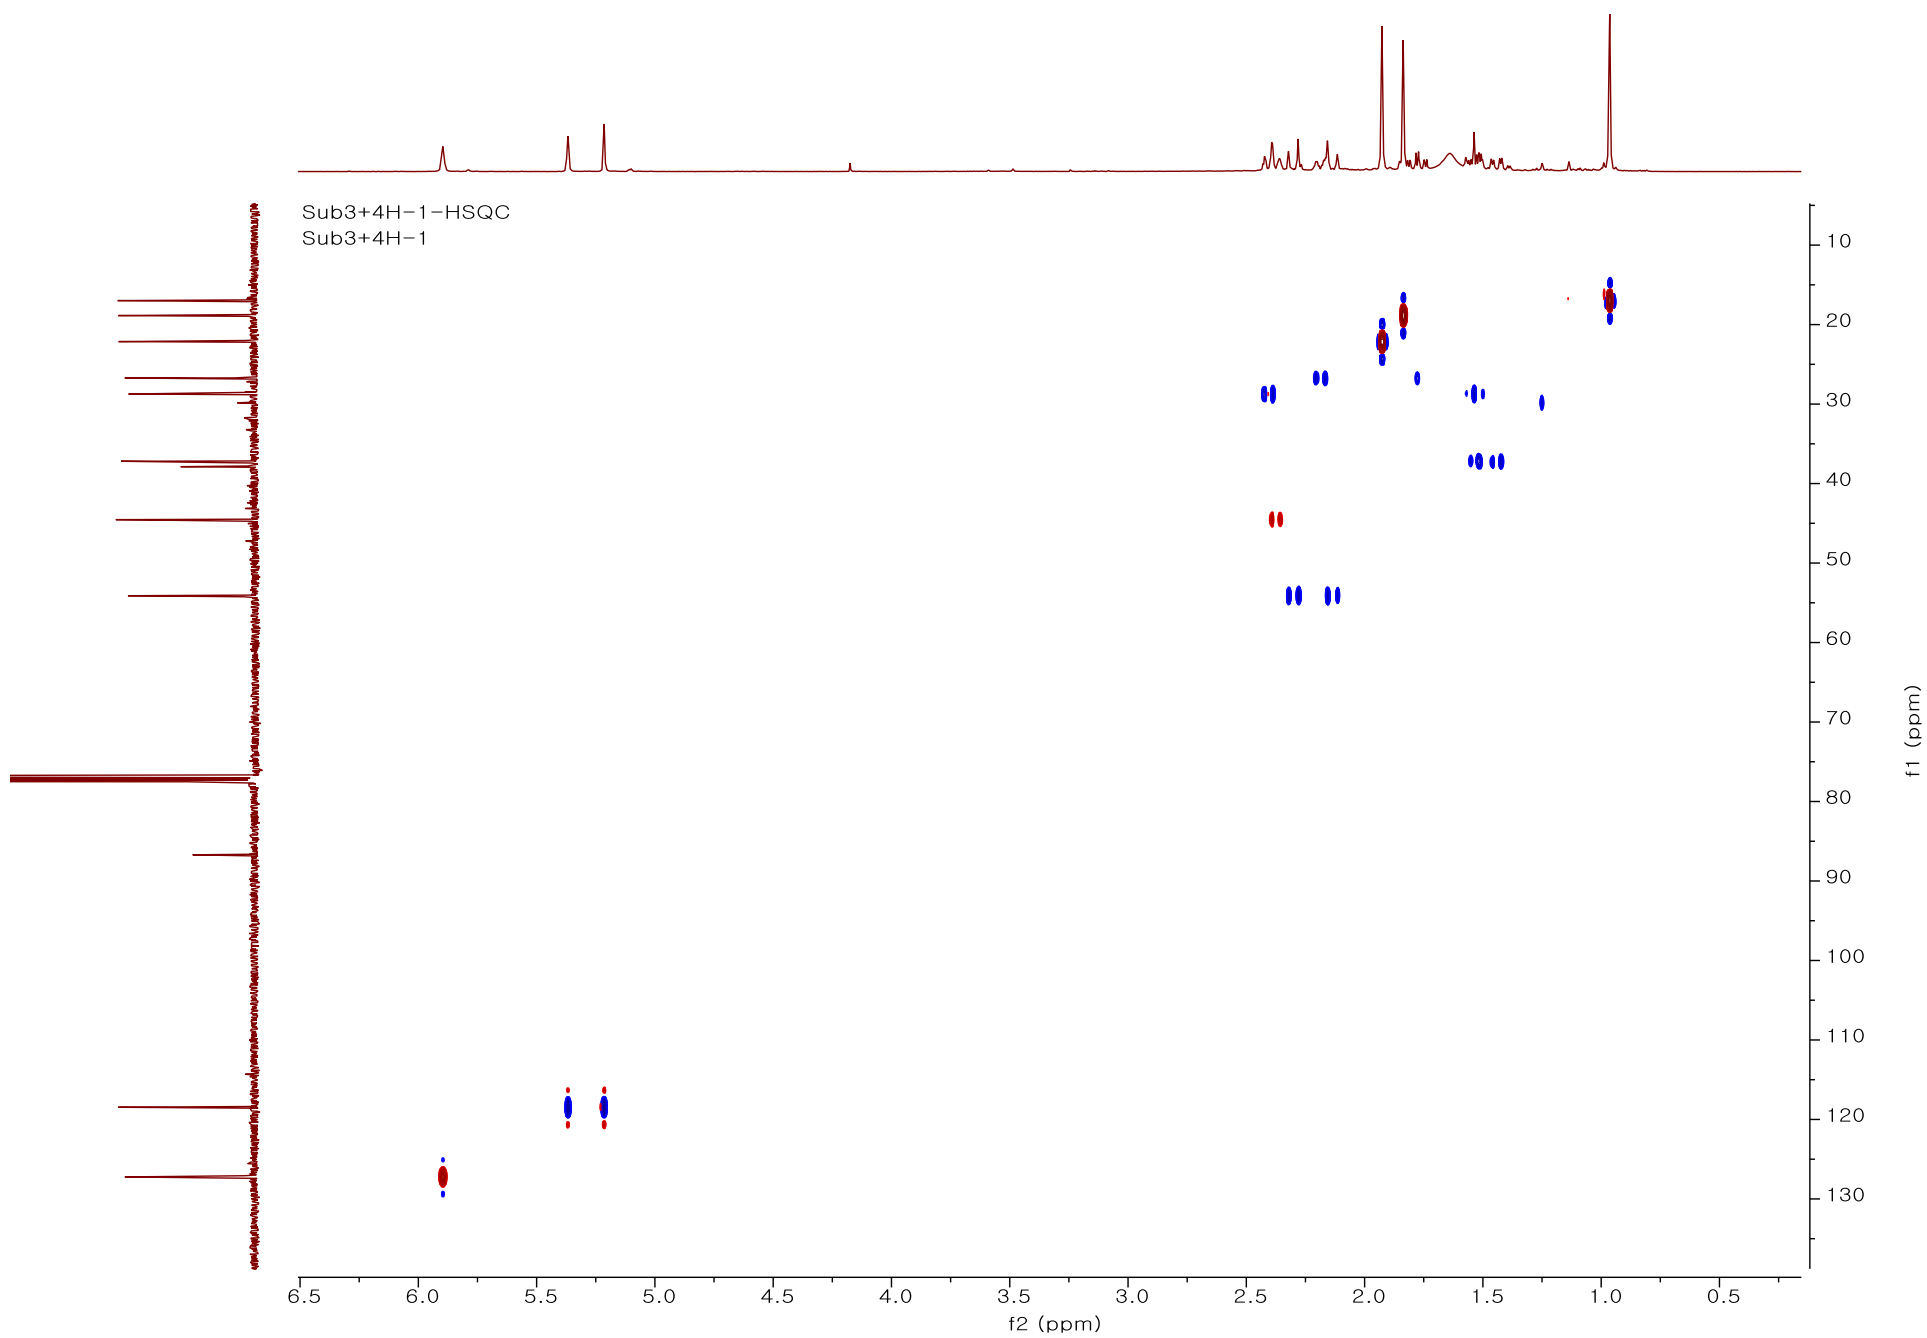

Figure S14.  $^1\text{H}$ - $^{13}\text{C}$  HMBC NMR ( $\text{CDCl}_3$ ) of compound **2**

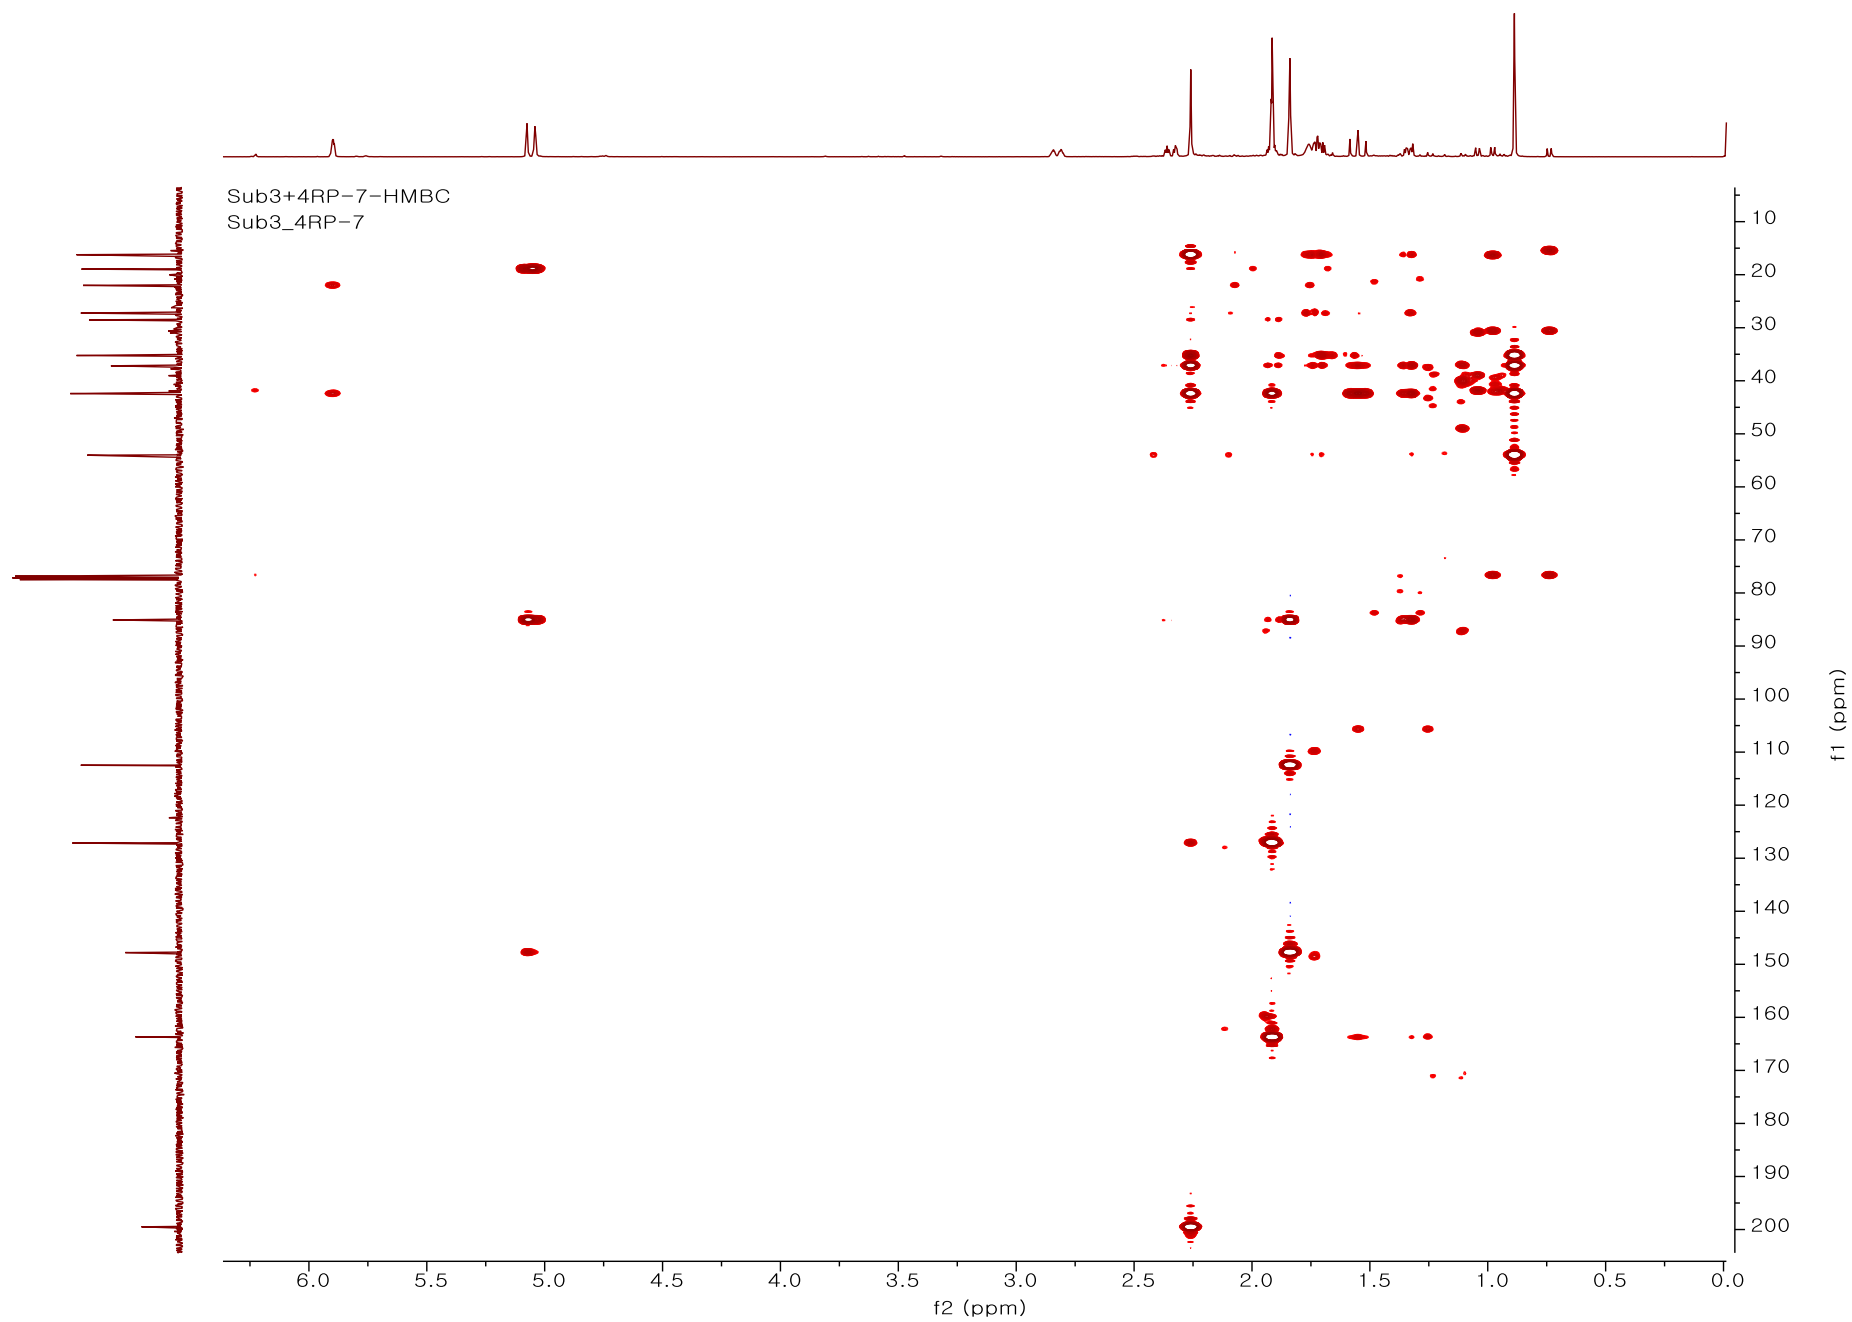



Figure S15.  $^1\text{H}$ - $^1\text{H}$  NOESY NMR ( $\text{CDCl}_3$ ) of compound **2**

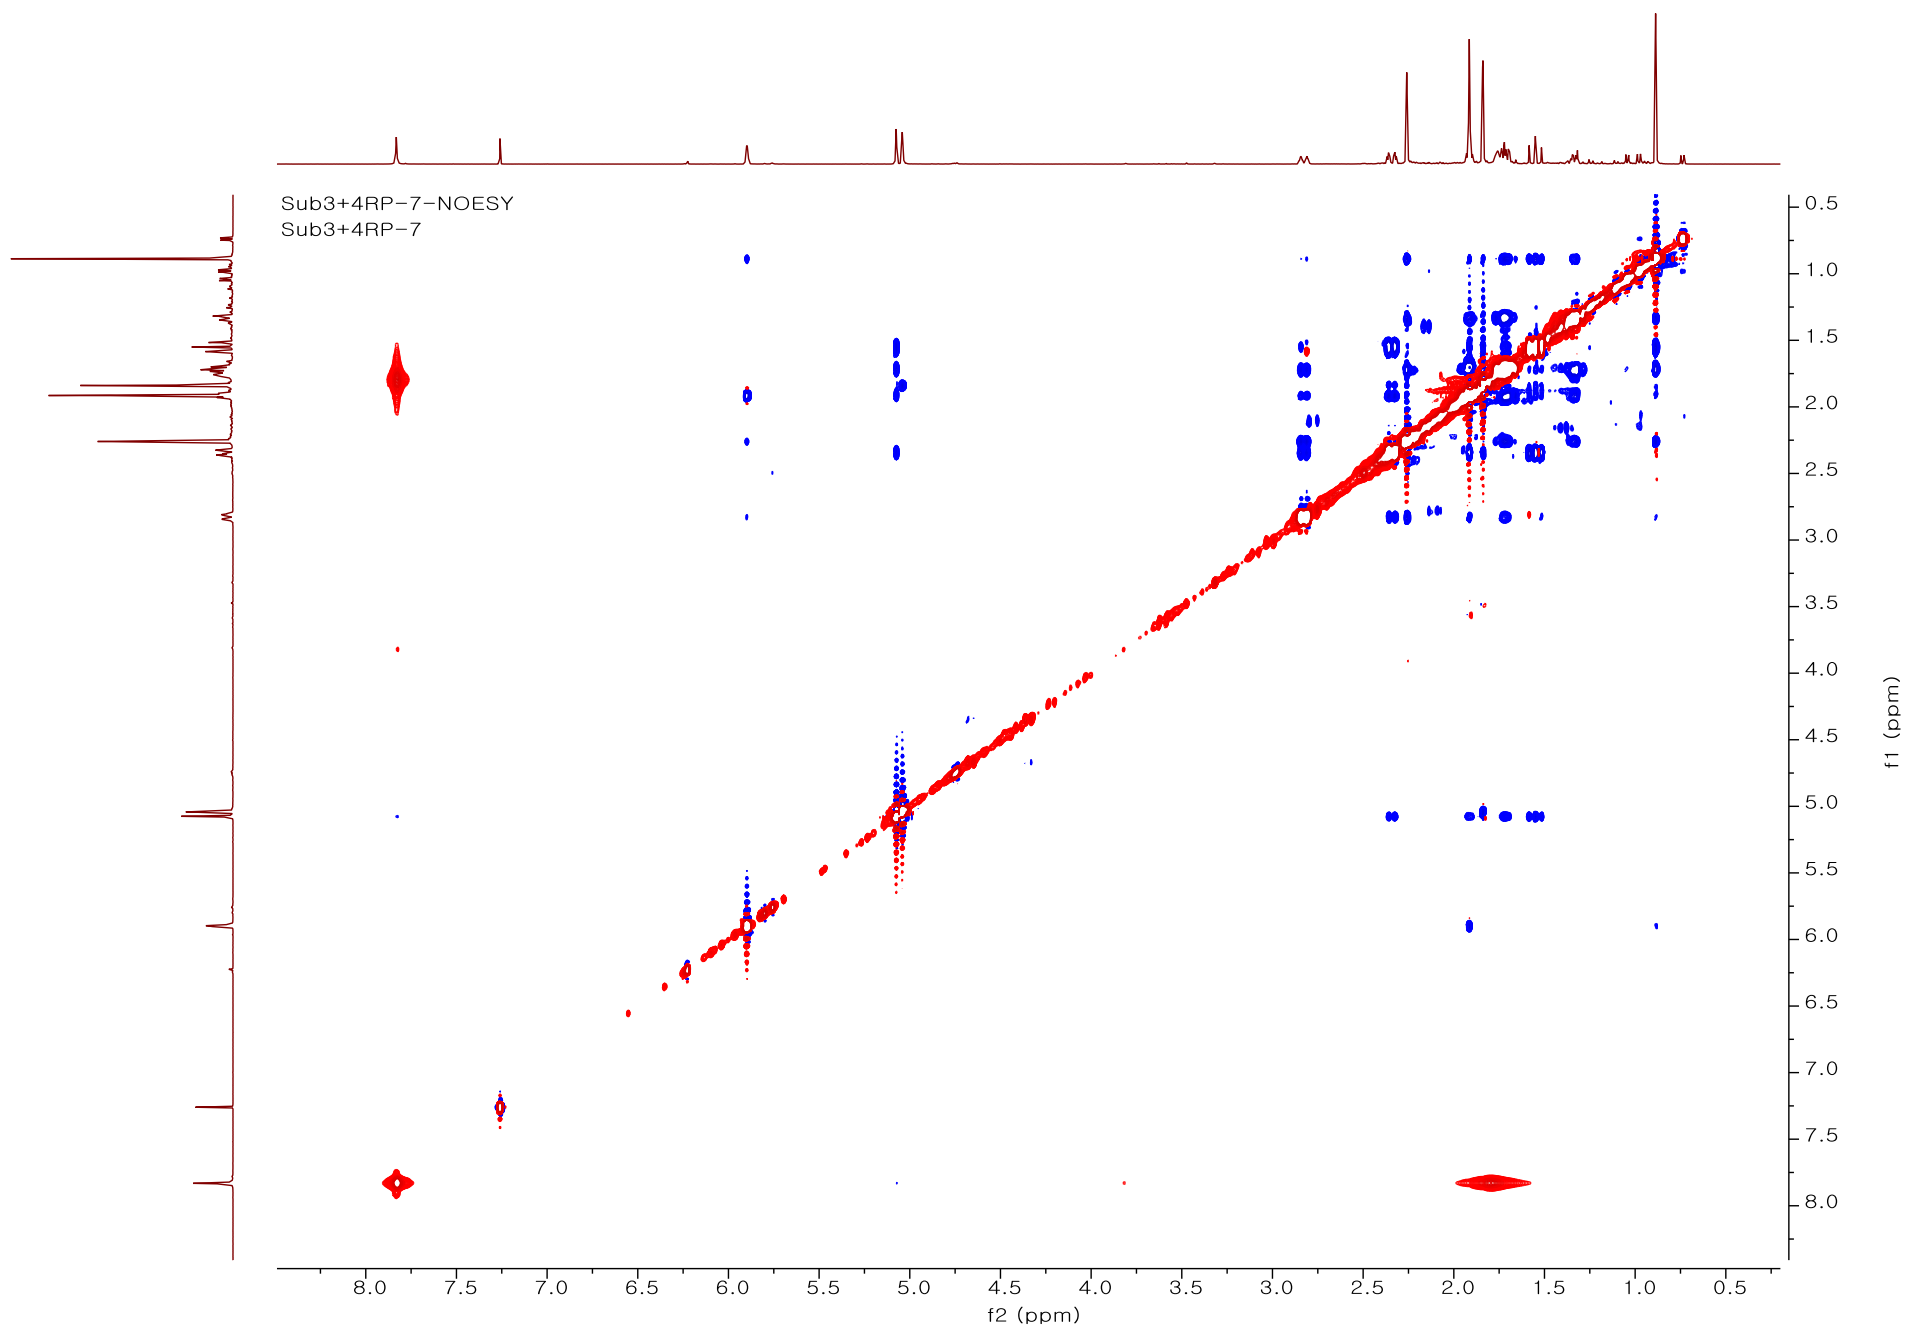

Figure S16. HR-ESIMS of compound 2

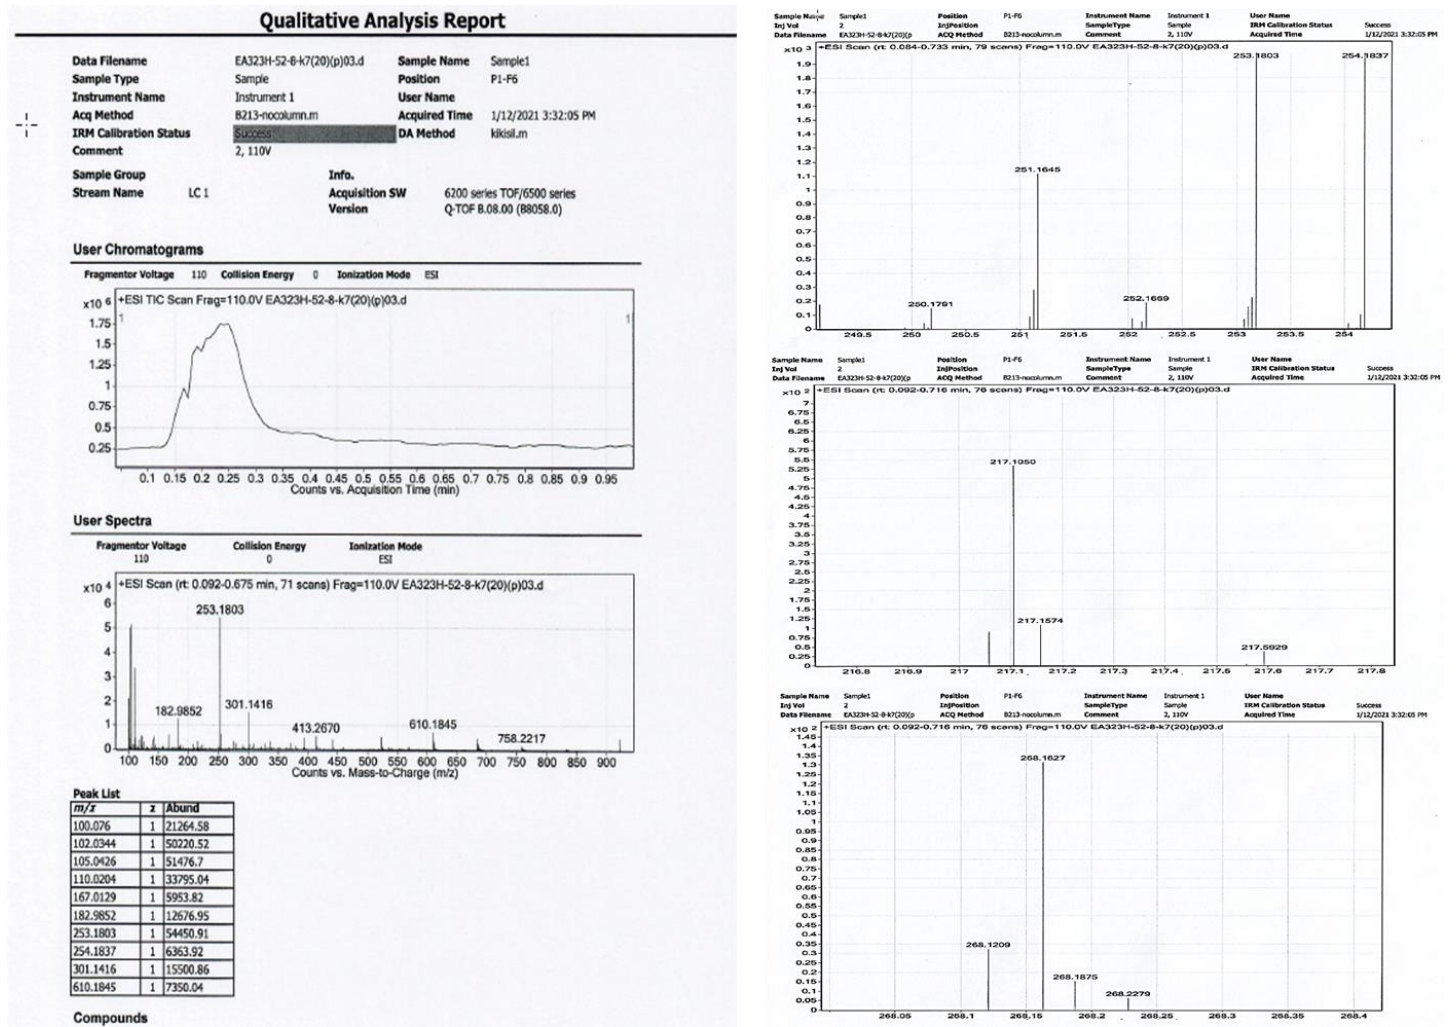

Figure S17.  $^1\text{H}$  NMR (400 MHz,  $\text{CDCl}_3$ ) of compound **3**

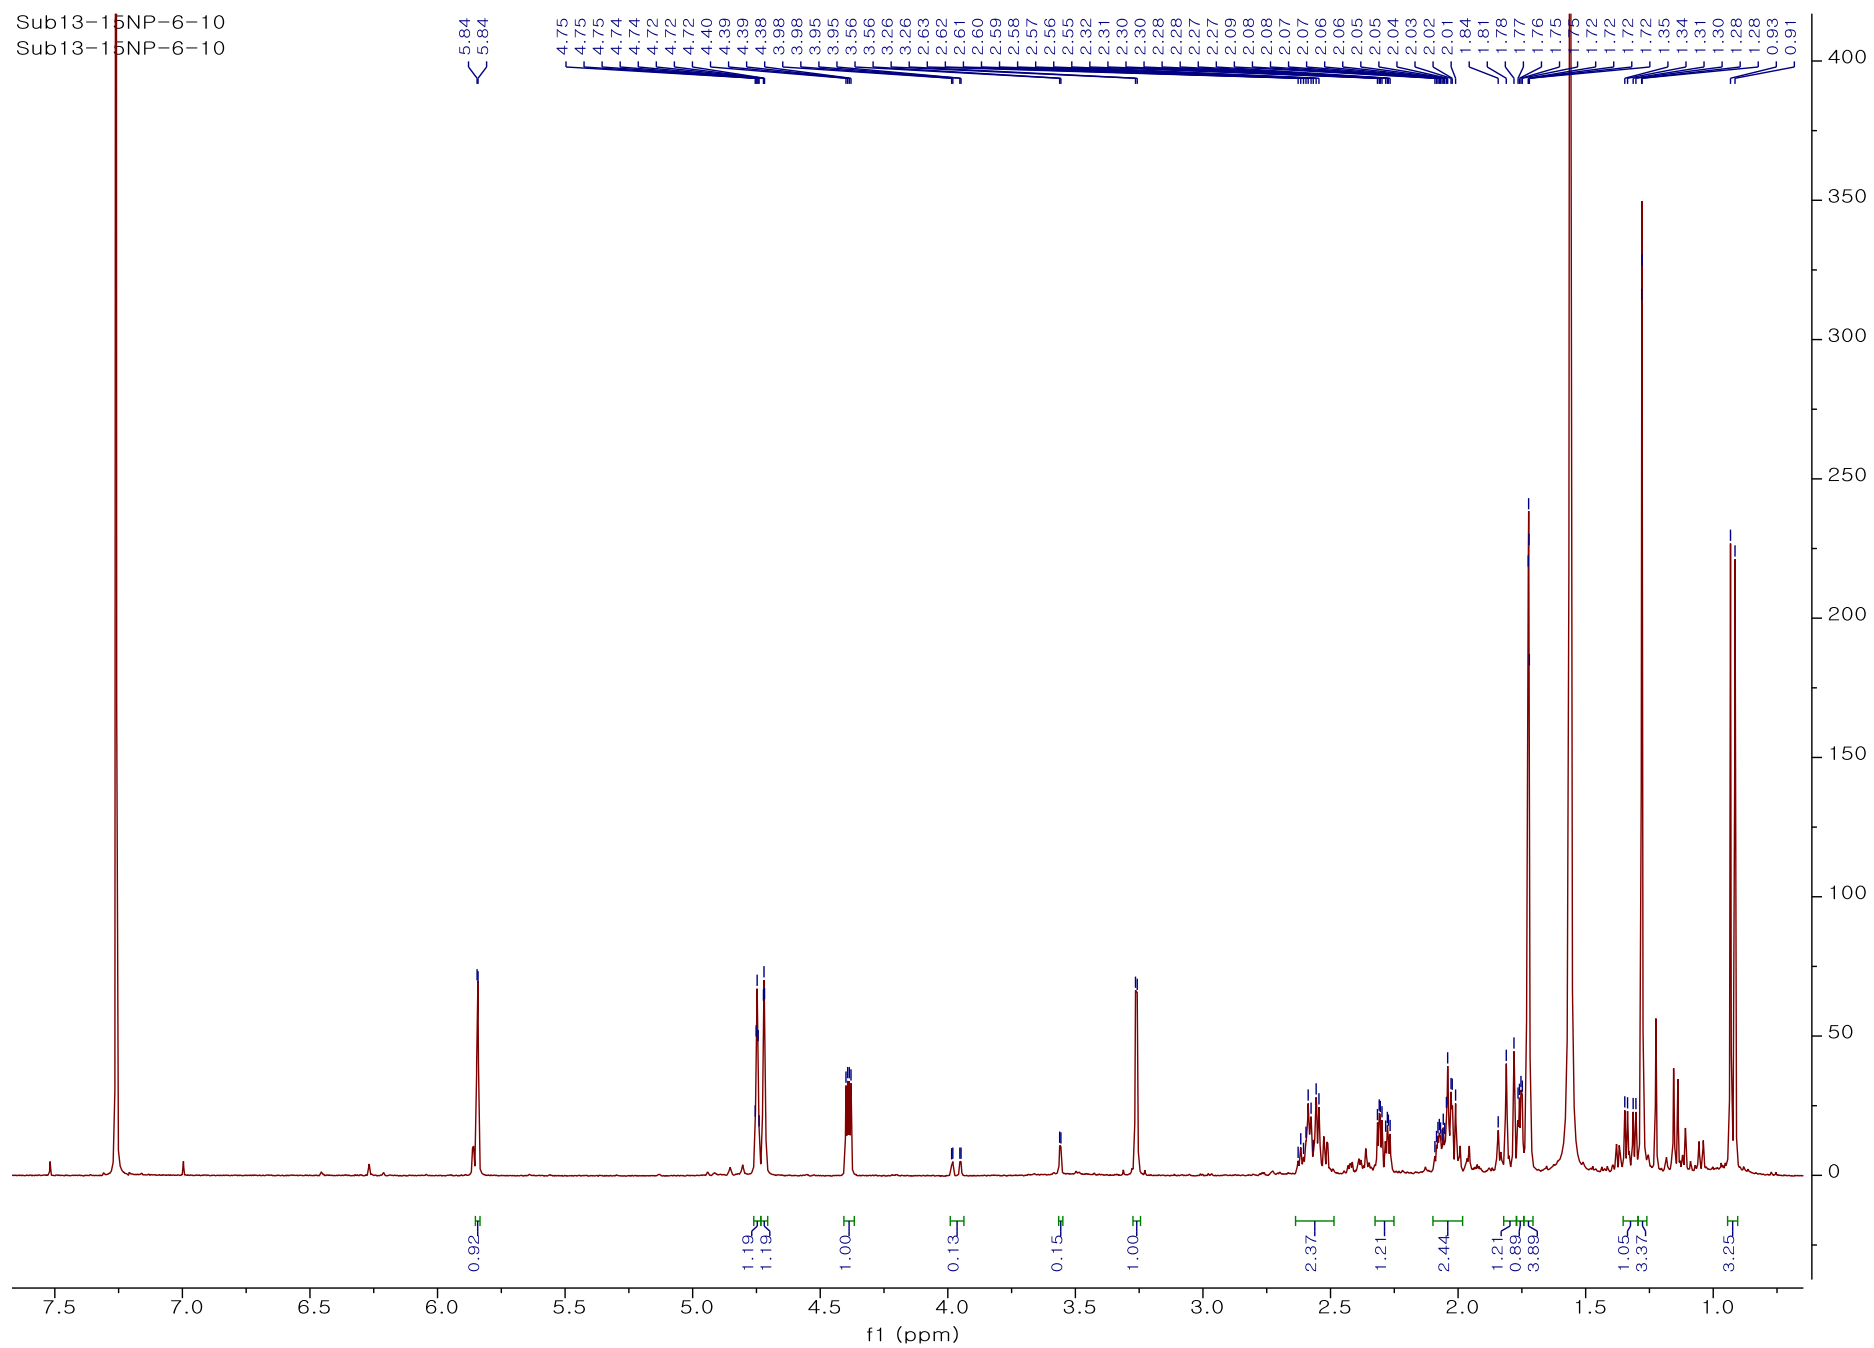

Figure S18.  $^{13}\text{C}$  NMR (150 MHz,  $\text{CDCl}_3$ ) of compound **3**

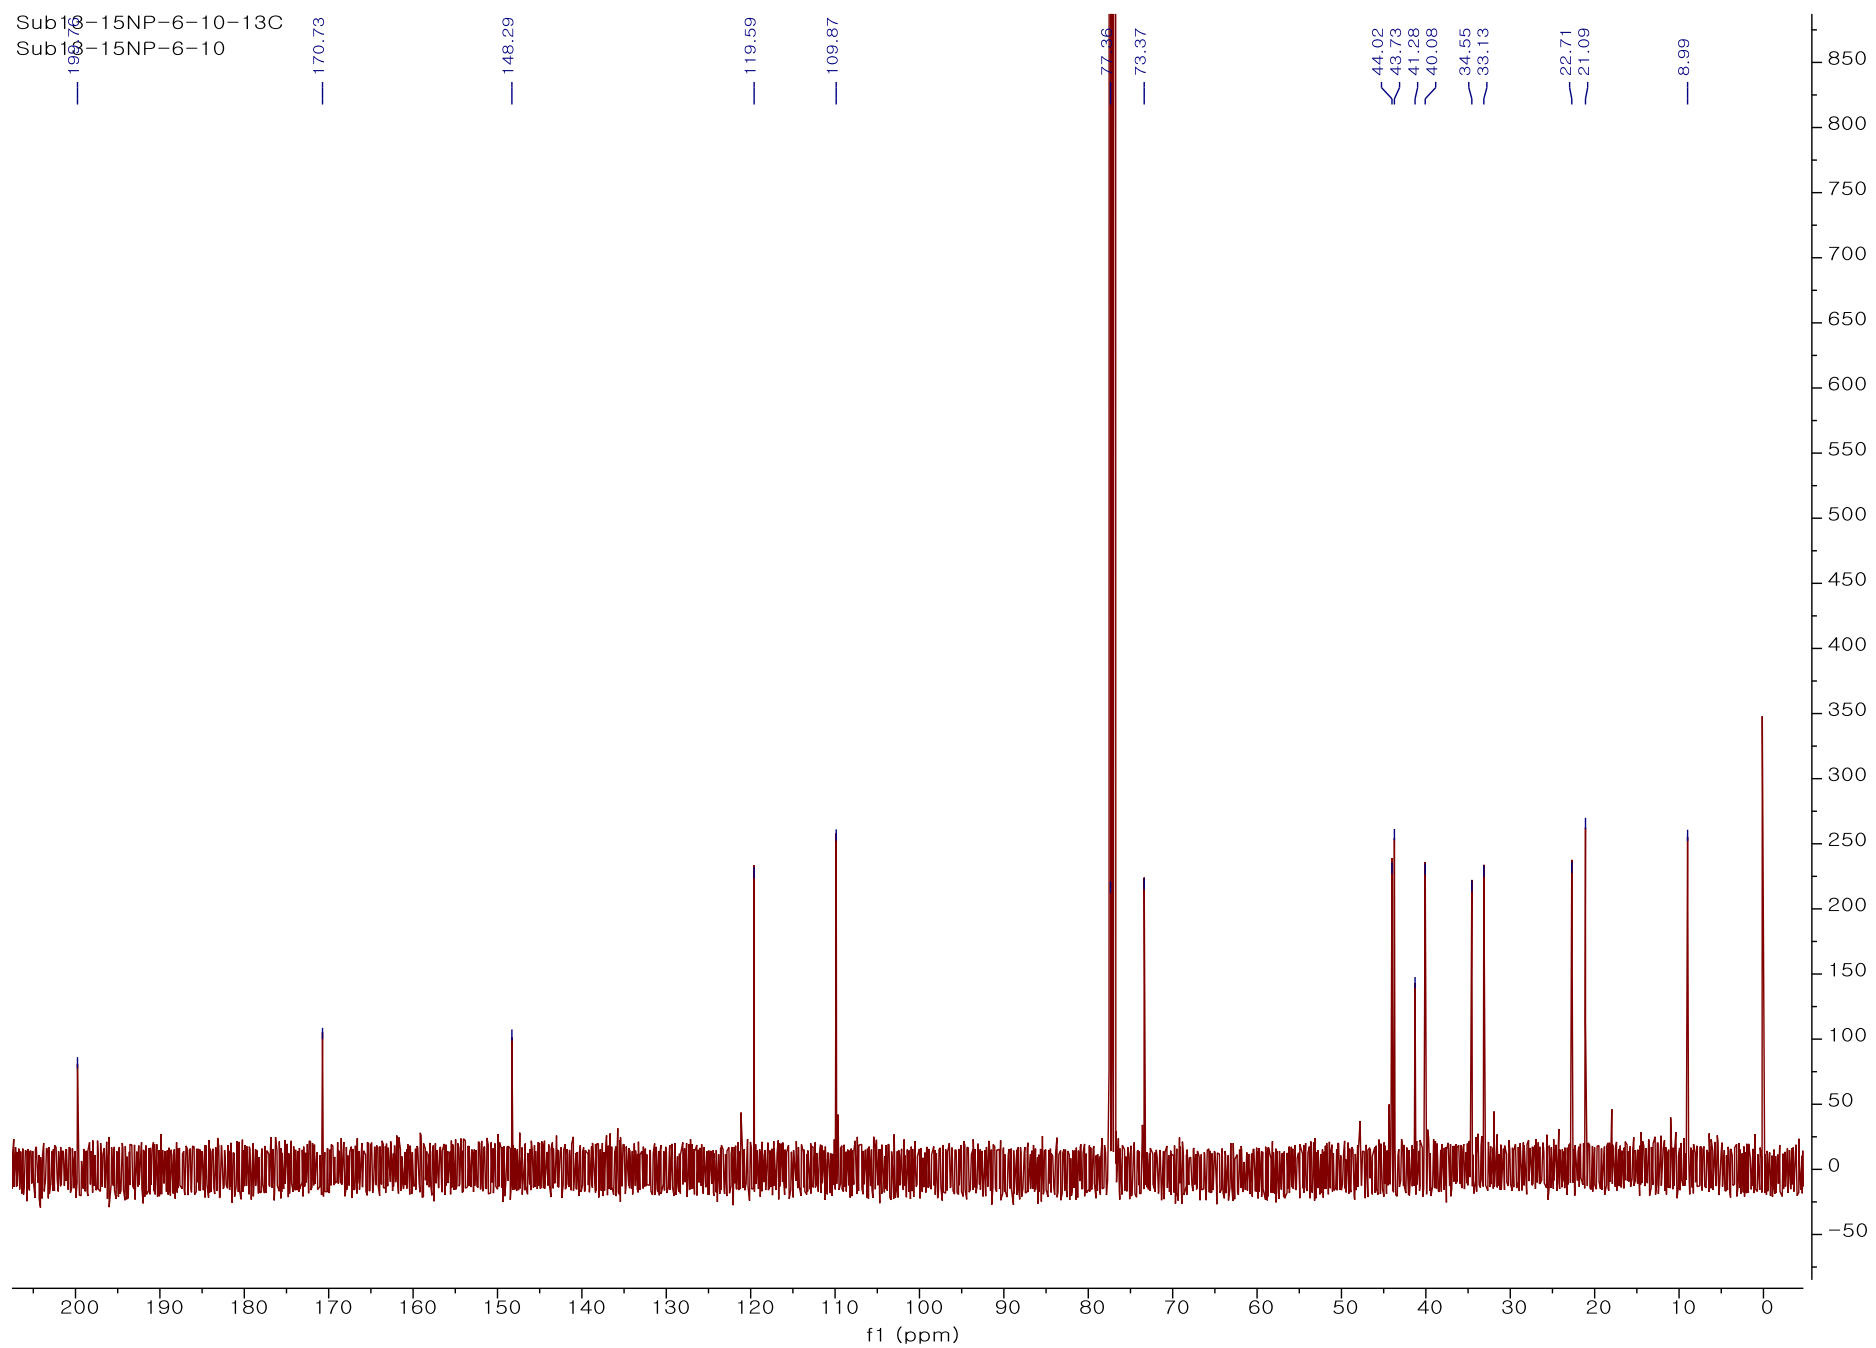

Figure S19. DEPT-135 NMR (150 MHz, CDCl<sub>3</sub>) of compound **3**

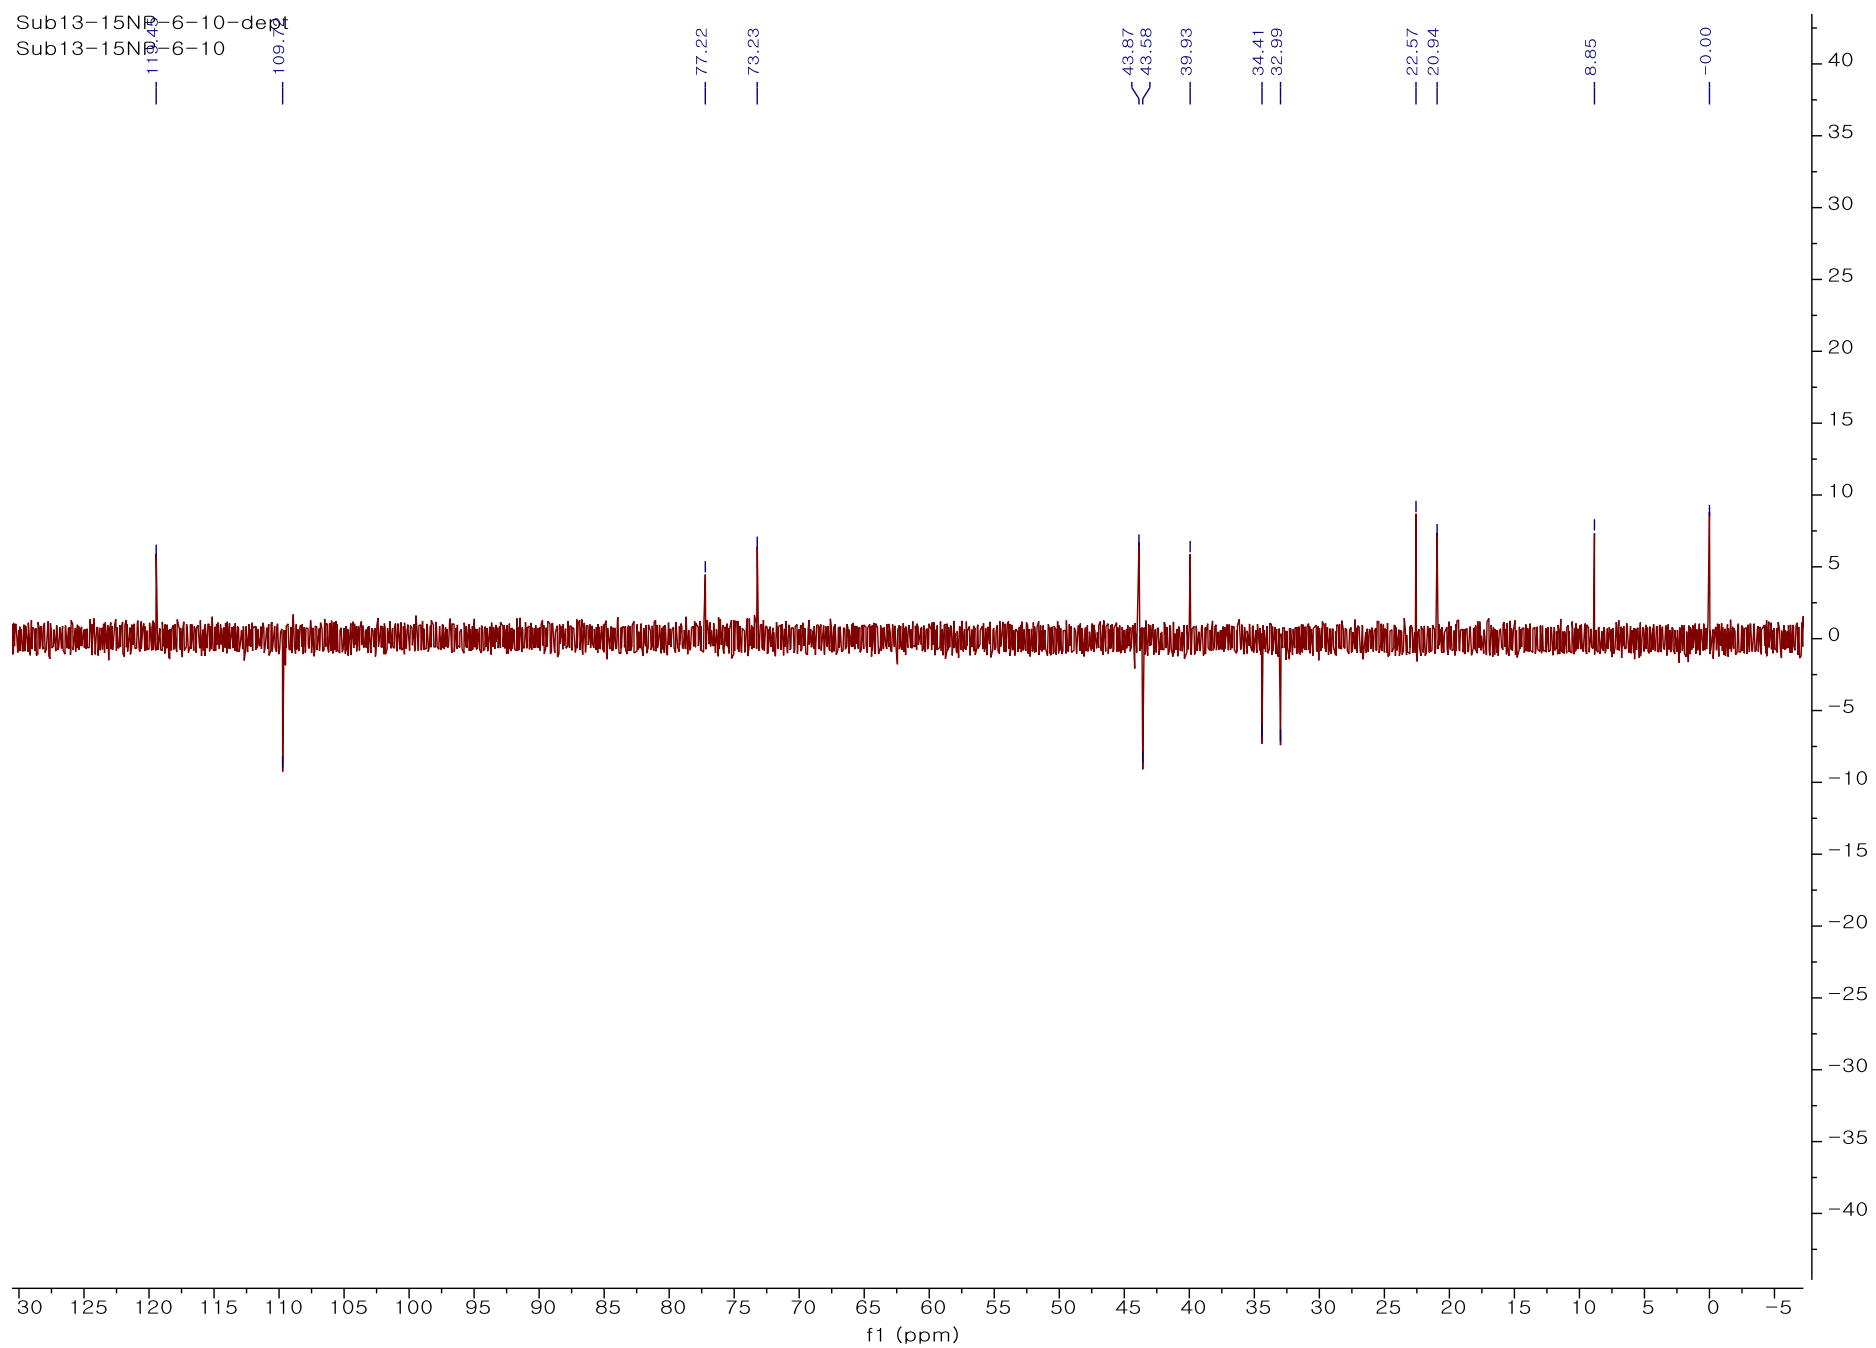

Figure S20.  $^1\text{H}$ - $^1\text{H}$  COSY NMR ( $\text{CDCl}_3$ ) of compound **3**

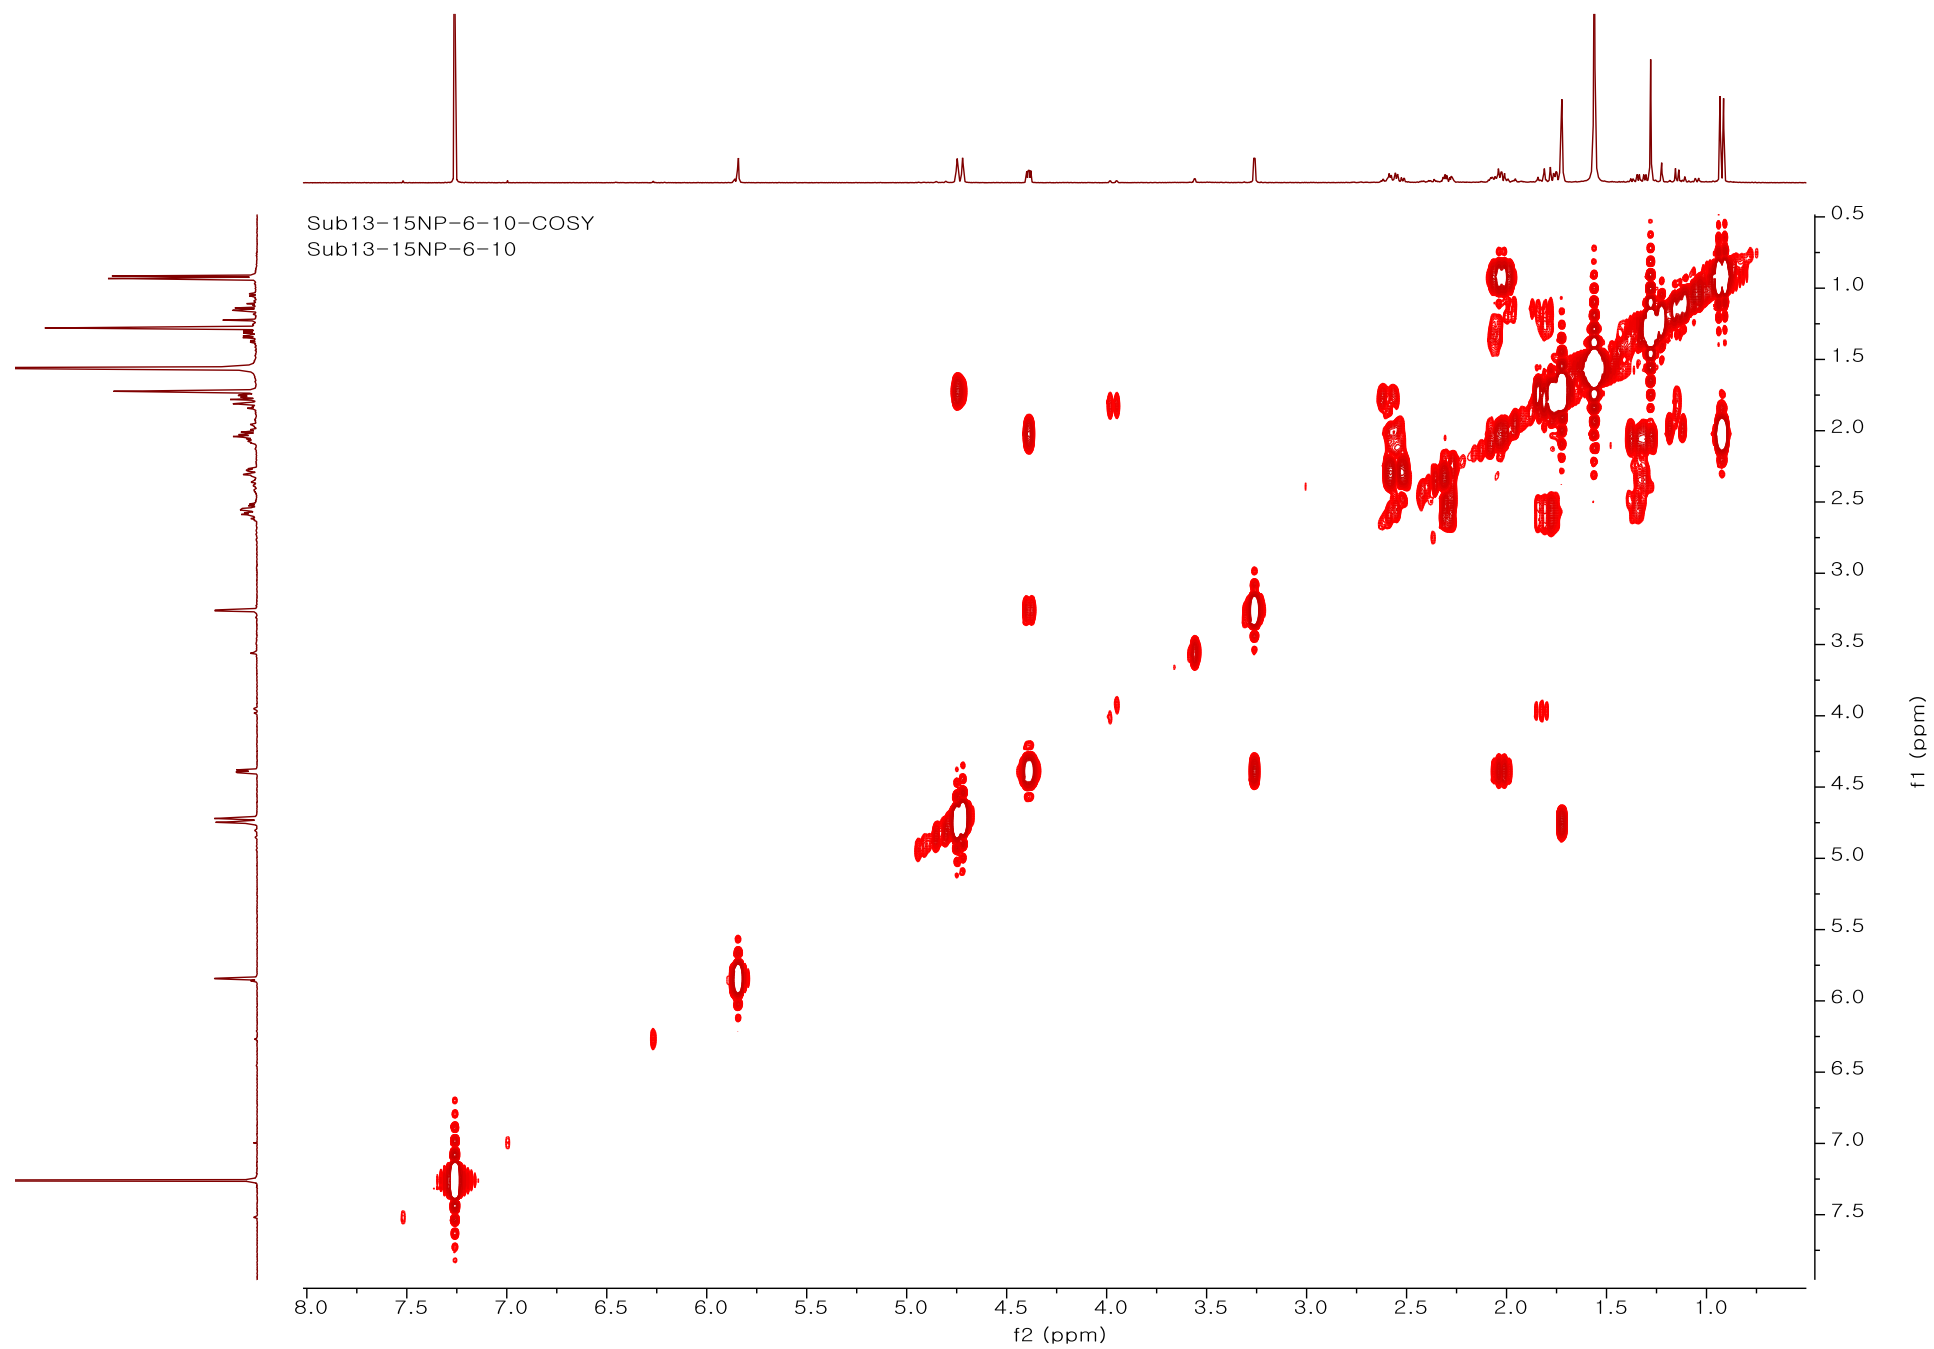

Figure S21.  $^1\text{H}$ - $^{13}\text{C}$  HSQC NMR ( $\text{CDCl}_3$ ) of compound **3**

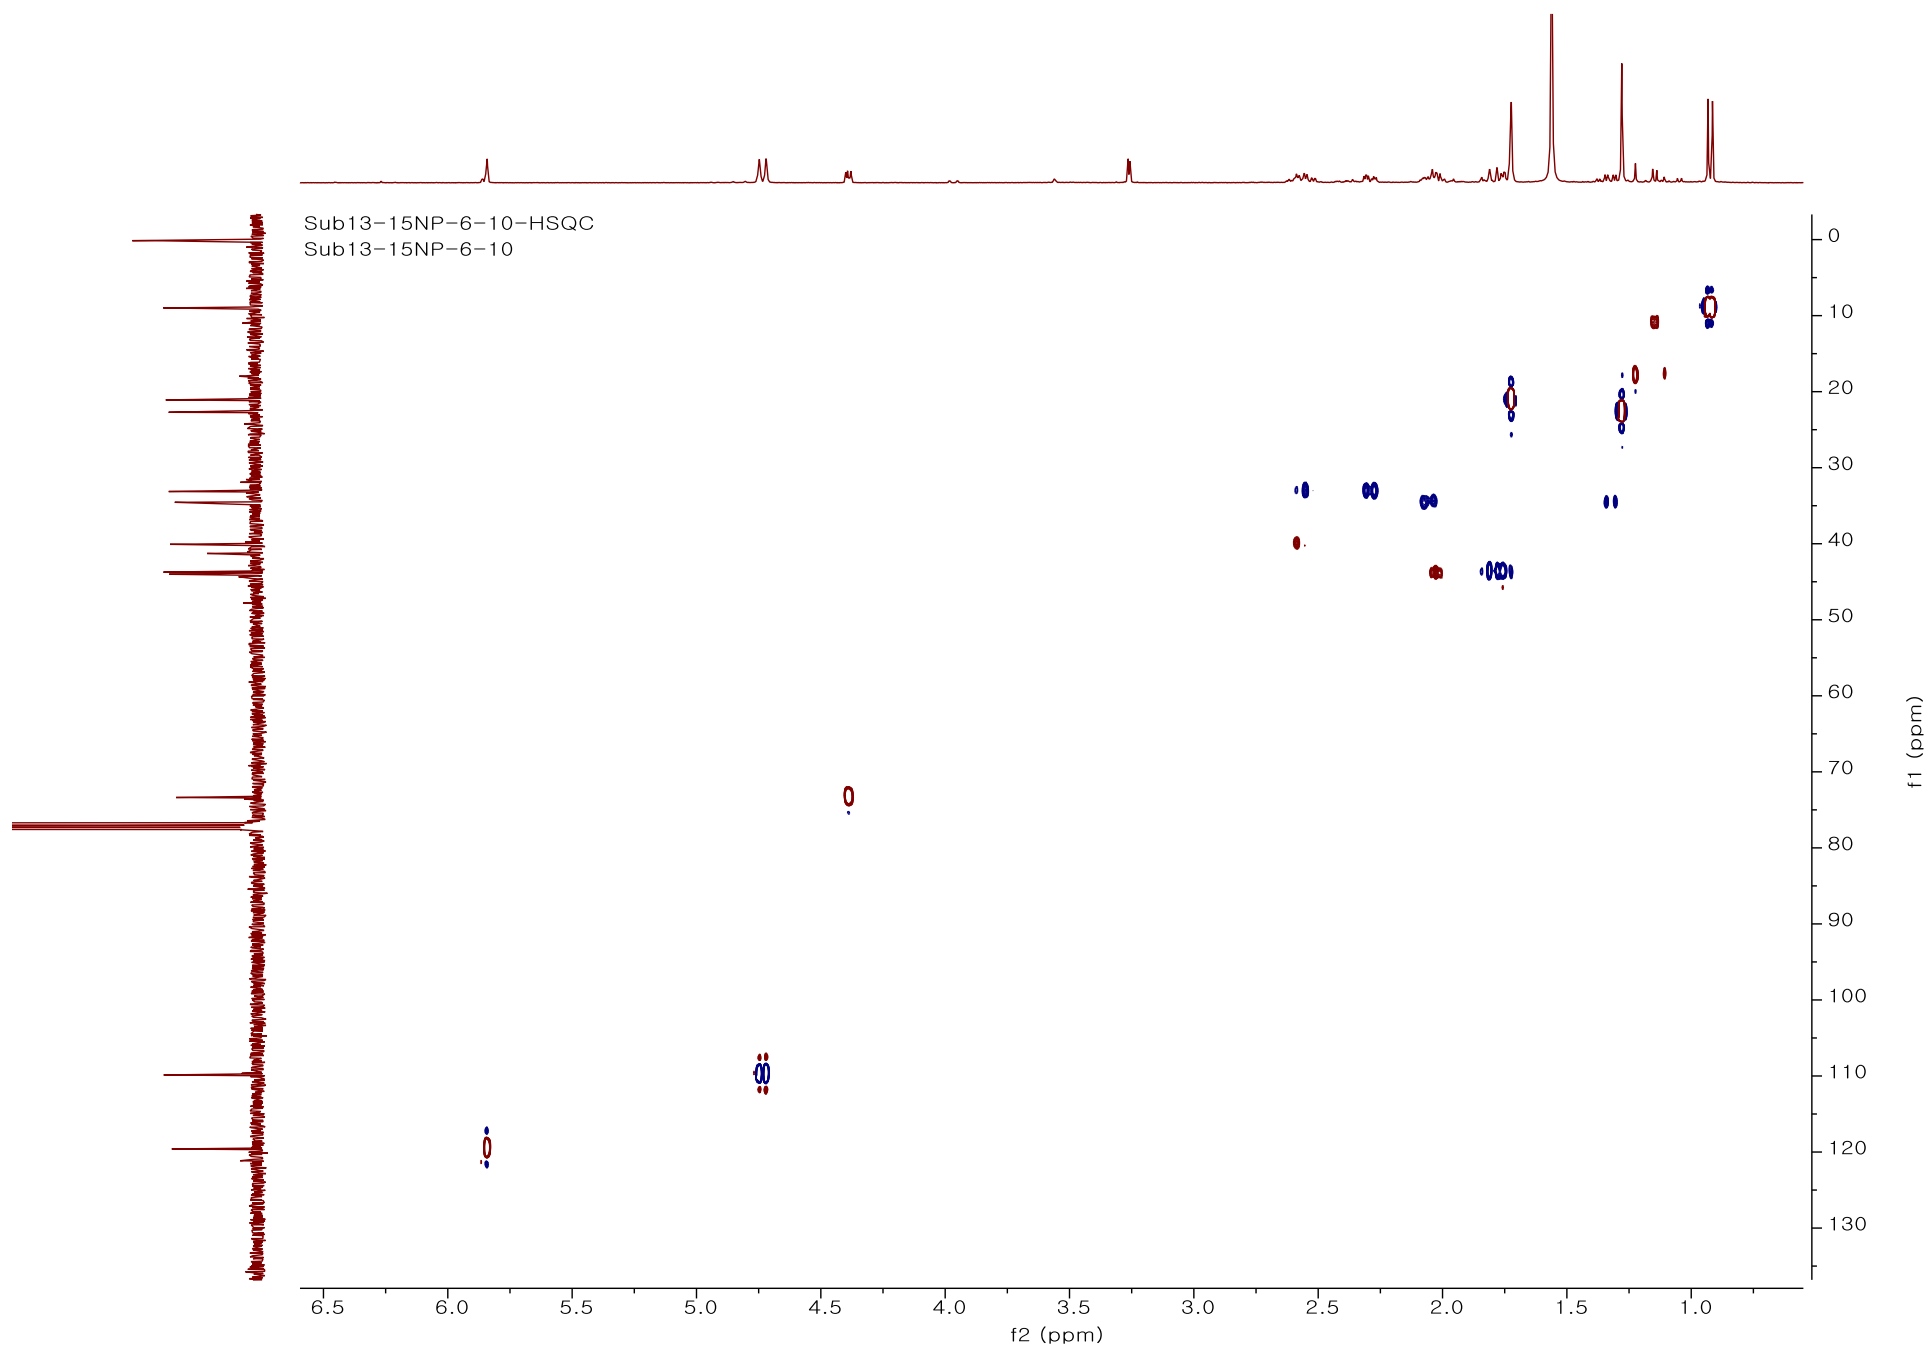

Figure S22.  $^1\text{H}$ - $^{13}\text{C}$  HMBC NMR ( $\text{CDCl}_3$ ) of compound **3**

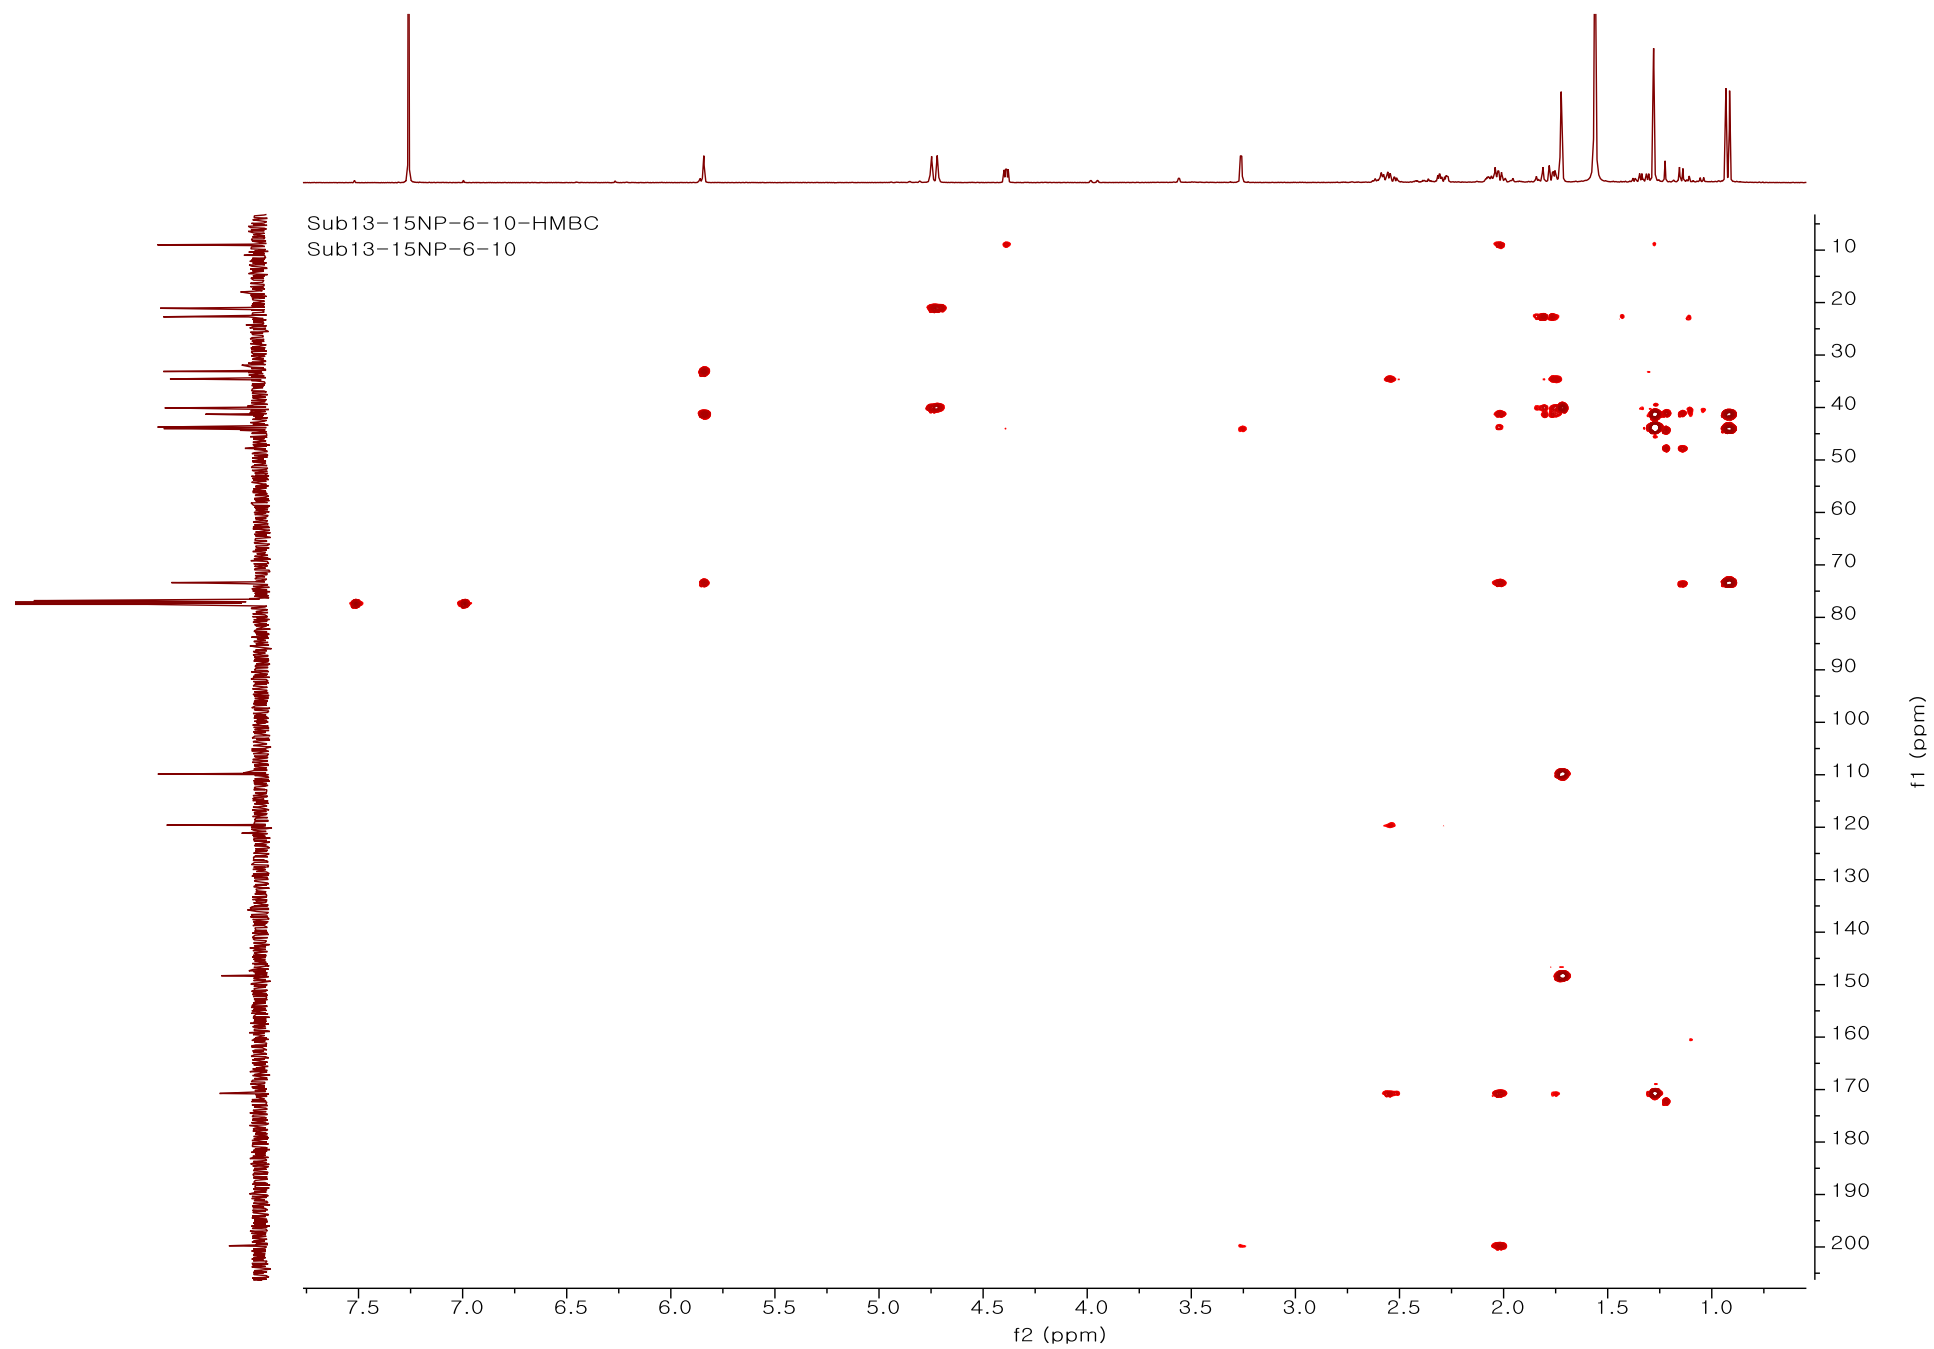



Figure S23.  $^1\text{H}$ - $^1\text{H}$  NOESY NMR ( $\text{CDCl}_3$ ) of compound **3**

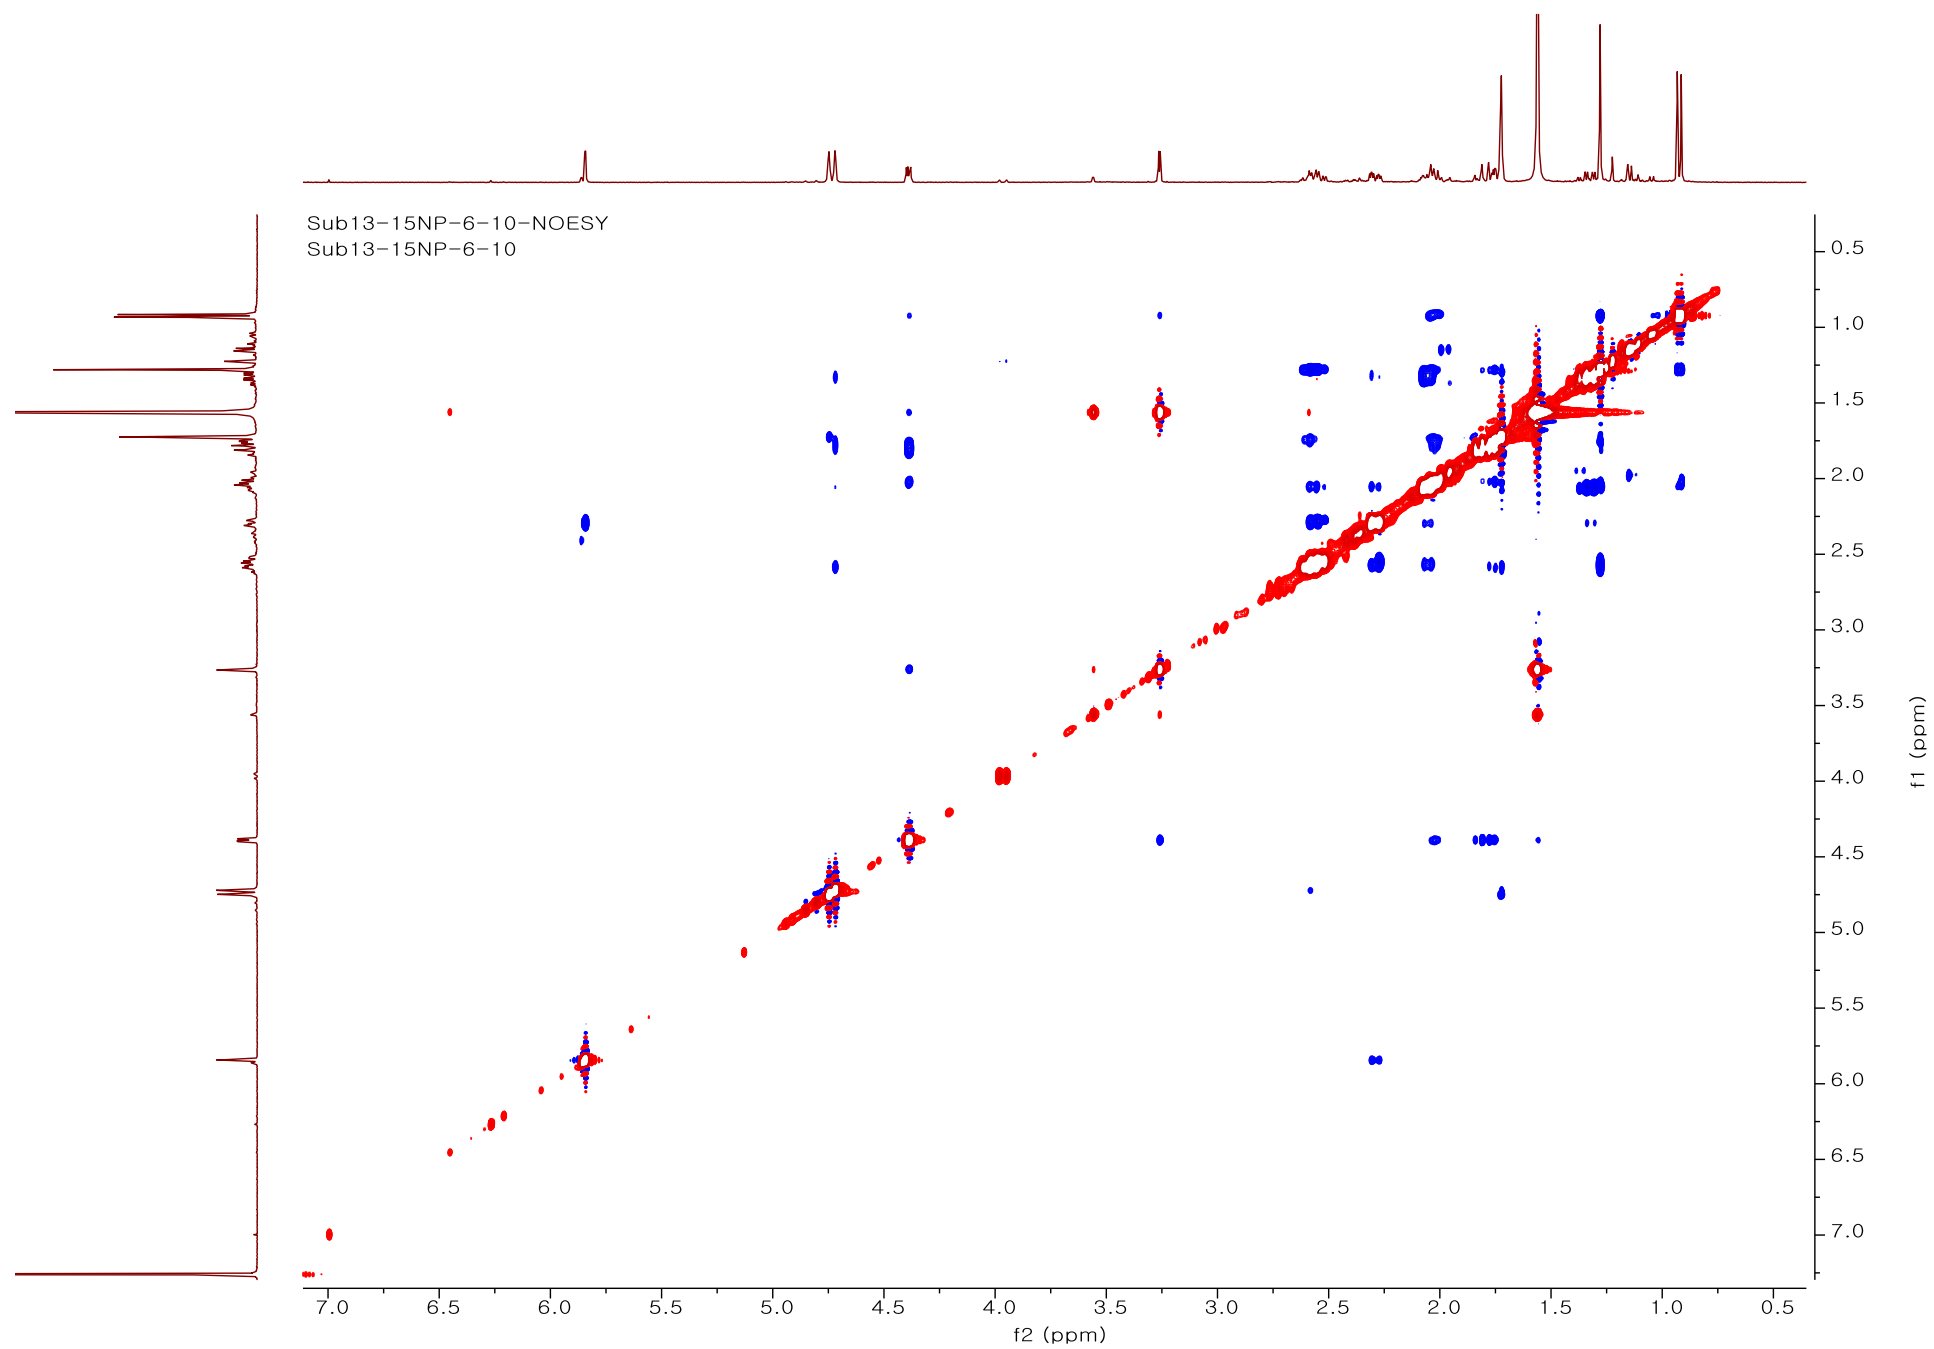

Figure S24. HR-ESIMS of compound 3

**Data File** EA323H-52-11-k10(p)01.d **Sample Name** Sample1  
**Sample Type** Sample **Position** P1-A2  
**Instrument Name** Instrument 1 **User Name**  
**Acq Method** B213-nocolumn.m **Acquired Time** 1/15/2020 3:45:45 PM  
**IRM Calibration Status** Success **DA Method** kikisil.m  
**Comment** 0.1, 110V

**Sample Group** **Info.**  
**Stream Name** LC 1 **Acquisition SW** 6200 series TOF/6500  
**Version** series Q-TOF B.08.00

**Compound Table**

| Compound Label    | RT    | Mass     | Abund | Formula    | Tgt Mass | Diff (ppm) |
|-------------------|-------|----------|-------|------------|----------|------------|
| Cpd 1: C15 H22 O2 | 0.193 | 234.1617 | 3592  | C15 H22 O2 | 234.162  | -1.15      |

| Compound Label    | m/z      | RT    | Algorithm       | Mass     |
|-------------------|----------|-------|-----------------|----------|
| Cpd 1: C15 H22 O2 | 235.1692 | 0.193 | Find By Formula | 234.1617 |

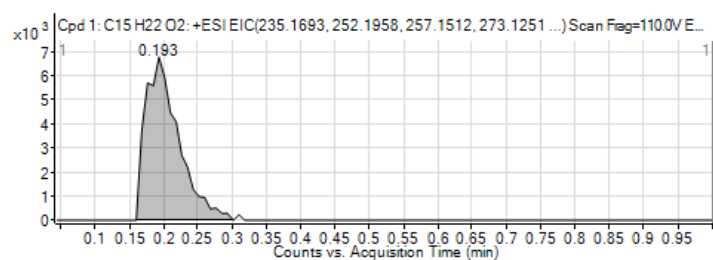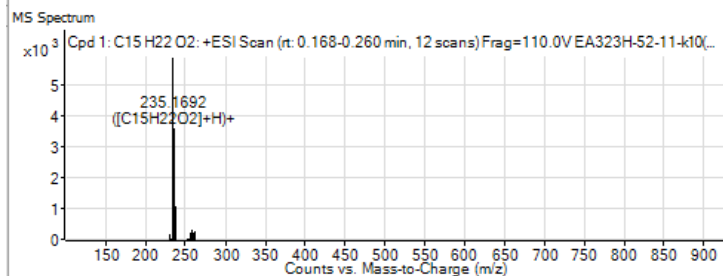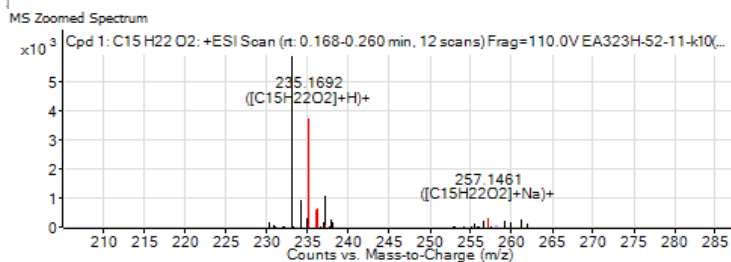

**MS Spectrum Peak List**

| m/z      | Calc m/z | Diff (ppm) | z | Abund   | Formula  | Ion     |
|----------|----------|------------|---|---------|----------|---------|
| 235.1692 | 235.1693 | 0.34       | 1 | 3591.88 | C15H22O2 | (M+H)+  |
| 236.1723 | 236.1727 | 1.46       | 1 | 607.99  | C15H22O2 | (M+H)+  |
| 237.1803 | 237.1755 | -20.43     | 1 | 162.33  | C15H22O2 | (M+H)+  |
| 257.1461 | 257.1512 | 19.72      | 1 | 304.25  | C15H22O2 | (M+Na)+ |
